# Supplementary material for: Factors accounting for limited sexual reproduction in a long-lived unisexual plant species
Source: Front Plant Sci. 2025 Feb 11;16:1456877. doi: 10.3389/fpls.2025.1456877 (PMC11850334; doi:10.3389/fpls.2025.1456877)
Supplement: Supplementary file 2 [file Table1.xlsx]

## Sheet: Table S1
Table S1: Locality data of samples of Abietinella abietina
N = 1080
Bisang, Collart, Vanderpoorten & Hedenäs: Factors accounting for limited sexual reproduction in a long-lived unisexual plant species
Region code: N, northern Sweden; C, central Sweden; S, southern Sweden. See manuscript for delimitation
Locality, all Sweden: Floristic province, parish. Longitude. Latitude.
Collecting year. Collector(s)
Registration number [Bxxx] in the herbarium of the Swedish Museum of Natural History (S)
Reproductive stage: non-expressing (samples without reproductive organs), male sex expressing, female sex expressing, samples with sporophytes
							Reproductive stage
Region code	Locality	Longitude	Latitude	Collecting year	Collector(s)	S registration no	NON-EXPRESSING	MALE	FEMALE	c.sp.
N	Jämtland, Alanäs, Havsnäs, Kalkberget, 422 m a.s.l.	15.8122	64.0941	1925	R. Florin	B16903	0	1	0	0
N	Jämtland, Frostviken	14.1353	64.5039	1873	E. Collinder	B16906	0	0	1	0
N	Jämtland, Frostviken sn., SW part of Gervenåkko’s escarpment tow. SE, (23E26)	14.4009	65.026	1988	L. Hedenäs	B3943	1	0	0	0
N	Jämtland, Frostviken, Fågelbergets sydbranter	14.578	64.3843	1915	H. E. Johansson	B17028	0	1	0	0
N	Jämtland, Frostviken, Kalberget (Håkafot)	14.4506	64.3963	1986	L. Hedenäs	B16935	0	0	1	0
N	Jämtland, Frostviken, SSE facing escarpment below main peak of Mt. Brakkfjället, 920 m a.s.l.	13.9333	64.8086	2009	Lars Hedenäs	B164553	0	0	1	0
N	Jämtland, Ström, Löfberga	15.8519	63.9637	1914	H. Möller	B16907	0	0	1	0
N	Jämtland, Ström, Strömsund	15.5559	63.8506	1914	H. Möller	B16908	1	0	0	0
N	Jämtland, Ström, Ulriksfors	15.6204	63.8315	1914	H. Möller	B16904	0	0	1	0
N	Jämtland, Strömsund	15.5559	63.8506	1918	C. Stenholm	B17036	0	0	1	0
N	Lule Lappmark, Gällivare, below NE slope of Mt. Repisvaara, 360 m a.s.l.	20.6794	67.12	2017	Lars Hedenäs	B253287	0	0	1	0
N	Lule Lappmark, Gällivare, Hakkas	21.5486	66.9169	1942	E. von Krusenstjerna 35	B17162	1	0	0	0
N	Lule Lappmark, Jokkmokk, Kamajokk	17.7046	66.9779	1891	Erik Nyman	B17160	1	0	0	0
N	Lule lappmark, Jokkmokk, Kierkevare, V-sluttning, V Kalmetjåkkå 750-850 m, RN: 1540500 / 7465000	16.7436	67.2777	2002	Tomas Hallingbäck 38392	B201844	0	0	1	0
N	Lule Lappmark, Jokkmokk, Kvikkjokk	17.7239	66.952	1891	Erik Nyman	B17159	1	0	0	0
N	Lule Lappmark, Jokkmokk, Kvikkjokk, Kaddepakte	17.7541	66.8961	1891	Erik Nyman	B17155	0	0	1	0
N	Lule Lappmark, Jokkmokk, Kvikkjokk, Kamajock	17.7046	66.9779	1893	Erik Nyman	B17152	1	0	0	0
N	Lule Lappmark, Jokkmokk, Kvikkjokk, Kerkevara	16.8651	67.2606	1893	Erik Nyman	B17158	1	0	0	0
N	Lule Lappmark, Jokkmokk, Kvikkjokk, Njuonjes, 350 m a.s.l.	17.4449	66.9604	1921	H. Möller	B17156	0	0	1	0
N	Lule Lappmark, Jokkmokk, Kvikkjokk, Tarra, (.)ortiluopta, björkreg.	17.2528	67.0108	1923	H. Möller	B17163	1	0	0	0
N	Lule lappmark, Jokkmokk, Kåbrek, klipphyllor nedom västra kammen. 815 möh, RN: 1530858 / 7469926	16.5213	67.323	2005	Tomas Hallingbäck 43282	B201845	1	0	0	0
N	Lule Lappmark, Jokkmokk, Njuonjes, vid ålp(..)	17.4449	66.9604	1891	Erik Nyman	B17153	1	0	0	0
N	Lule Lappmark, Jokkmokk, Porsi	20.644	66.465	1923	H. Möller	B17157	0	0	1	0
N	Lule Lappmark, Jokkmokk, regio Sarjekensis, Pårekkårså, vr.	17.784	67.0863	1902	C. Jensen & H. W. Arnell	B17161	0	1	0	0
N	Lule Lappmark, Jokkmokk, V Randijaur, 250 m a.s.l.	19.2437	66.7687	1921	H. Möller	B17154	0	0	1	0
N	Lule lappmark, Jokkmokk, Vaimat	19.677	66.5061	1970	Thor-Björn Engelmark	B304946	0	0	1	0
N	Luleå, Hindersön.	22.6011	65.5813	1923	H... Svenonius	B192085	0	0	1	0
N	Lycksele Lappmark, Lycksele sn., Bäcknäs, (22H99)	17.9128	64.8743	1916	H. Möller	B3944	0	0	1	0
N	Lycksele Lappmark, Lycksele sn., Karonbo, (22I28)	18.7622	64.5363	1916	H. Möller	B3945	0	0	1	0
N	Lycksele Lappmark, Sorsele sn., Gibbmovare, 400 m a.s.l. (24H90)	16.9413	65.7803	1925	H. Möller	B3946	1	0	0	0
N	Lycksele Lappmark, Tärna sn., (24F84=)	15.2335	65.7113	1933	Hülphers, A.	B3947	0	1	0	0
N	Lycksele Lappmark, Tärna sn., Laxfjället, c. 550 m a.s.l. (24F85-)	15.2602	65.7174	1916	H. Möller	B3948	1	0	0	0
N	Lycksele Lappmark, Tärna sn., Mjölkbäcken, (25F61)	14.8503	66.1009	1946	Hülphers, A.	B3949	1	0	0	0
N	Lycksele Lappmark, Tärna sn., Strimasund, (25F51)	14.8817	66.0534	1934	Hülphers, A.	B3950	0	1	0	0
N	Norrbotten, Hietaniemi sn., Hedenäset. vid gamla vägen till kyrkan ung 75-100 m V järnvägen [26N30]	23.6958	66.2139	1963	Oskar Lönnqvist 2343	B168239	1	0	0	0
N	Norrbotten, Hietaniemi sn., Hedenäset. vid gamla vägen till kyrkan ung. 75-100 m V om järnvägen [26N30-]	23.6958	66.2139	1963	Oskar Lönnqvist 4291	B168242	0	0	1	0
N	Norrbotten, Hietaniemi sn., Karkeinen. [26N22]	23.9169	66.1601	1966	Oskar Lönnqvist 3910	B168240	1	0	0	0
N	Norrbotten, Hietaniemi sn., Karkeinen. [26N22]	23.9169	66.1601	1964	Oskar Lönnqvist 4292	B168243	0	0	1	0
N	Norrbotten, Hietaniemi sn., Matkakoski. [26N23]	23.9255	66.146	1962	Oskar Lönnqvist 5315	B168251	0	0	1	0
N	Norrbotten, Karl Gustav sn., Karkeinen. Älvstranden S värnet.	23.9169	66.1601	1966	Oskar Lönnqvist	B183577	0	0	1	0
N	Norrbotten, Karl Gustav sn., Korpikylä. [26N23]	23.9302	66.1252	1963	Oskar Lönnqvist 2084	B168237	0	0	1	0
N	Norrbotten, Karl Gustav sn., Korpikylä. fundamentet till riksröse nr 47 [26N13]	23.9302	66.1252	1963	Oskar Lönnqvist 1985	B168236	1	0	0	0
N	Norrbotten, Karl Gustav sn., Potila. SV-sidan av berget .93 [26N22]	23.8678	66.1584	1967	Oskar Lönnqvist 5247	B168250	1	0	0	0
N	Norrbotten, Karl Gustav sn., ödegårds-grund, ca 400 m V om gården Lasu. 50 m S om stigen åt V.	23.9198	66.1542	1964	Oskar Lönnqvist	B185971	1	0	0	0
N	Norrbotten, Karl Gustav sn., Öfre Kukula, (25N94)	24.004	66.0131	1912	H. Möller	B3951	0	0	1	0
N	Norrbotten, Nederkalix sn., Kalix, Kyrkogården (25M56)	23.1305	65.8595	1929	Larsson, P. A.	B3952	1	0	0	0
N	Norrbotten, Nederkalix sn., Storöhamn, (25M26)	23.0829	65.7311	1944	Silfversparre, A.	B3953	0	0	1	0
N	Norrbotten, Nedertorneå sn., Haparanda, (25N55-)	24.1378	65.8447	1912	H. Möller	B3955	1	0	0	0
N	Norrbotten, Pajala sn., Kengis, (28M56)	23.484	67.1903	1912	H. Möller	B3956	0	0	1	0
N	Norrbotten, Pajala sn., Pajala, kyrkogården (28M55)	23.3772	67.2081	1912	H. Möller	B3958	0	1	0	0
N	Norrbotten, Tärendö sn., Orjakursu, ca 5 km SSO om Saittarova (28L65)	22.2621	67.291	1990	L. Hedenäs & M. Aronsson	B3959	1	0	0	0
N	Norrbotten, Töre sn., Falkbergets S-brant. [25M64]	22.8842	65.9184	1963	Oskar Lönnqvist 4284	B168241	1	0	0	0
N	Norrbotten, Älvsby sn., (24K97=)	21.0103	65.6683	1912	H. Möller	B3960	1	0	0	0
N	Norrbotten, Älvsby sn., Död-Larsberget. [25K14]	20.6892	65.7884	1967	Oskar Lönnqvist 5244	B168247	1	0	0	0
N	Norrbotten, Överkalix sn., Miekojärvi. på sista ängens norra torra del [26M65]	23.1553	66.3599	1967	Oskar Lönnqvist 981	B168235	0	0	1	0
N	Norrbotten, Överkalix sn., Miekojärvi. på sydligaste ängens norra, torra del [26M65]	23.1553	66.3599	1967	Oskar Lönnqvist 436	B168234	0	0	1	0
N	Norrbotten, Överluleå sn., Boden, (25L33-)	21.6887	65.8294	1912	H. Möller	B3961	0	0	1	0
N	Norrbotten, Övertorneå sn., Matarengi, (26N70-)	23.6676	66.3831	1912	H. Möller	B3963	1	0	0	0
N	Norrbotten, Övertorneå sn., Matarengi. [26N70]	23.6654	66.384	1963	Oskar Lönnqvist 4294	B168245	0	1	0	0
N	Norrbotten, Övertorneå sn., Matarengi. kyrkogårdsmuren [26N70]	23.6654	66.384	1963	Oskar Lönnqvist 4293	B168244	1	0	0	0
N	Norrbotten, Övertorneå sn., Matarengi. ängen å Pellikkä-backen [26N70]	23.6654	66.384	1966	Oskar Lönnqvist 2152	B168238	0	1	0	0
N	Norrbotten, Övertorneå sn., Pello, (27N71-)	23.9825	66.8038	1912	H. Möller	B3964	0	1	0	0
N	Norrbotten, Övertorneå sn., Puostijärvi. några 10-tals m uppför bäcken 50 m N om Ojas [26M77]	23.3535	66.4112	1960	Oskar Lönnqvist 5083	B168246	0	1	0	0
N	Norrbotten, Övertorneå sn., Ruskola. [26N60]	23.6497	66.357	1967	Oskar Lönnqvist 5246	B168249	0	0	1	0
N	Norrbotten, Övertorneå sn., Ruskola. [26N60]	23.6497	66.357	1967	Oskar Lönnqvist 5494	B168252	0	1	0	0
N	Norrbotten, Övertorneå sn., Svanstein, (27N31-)	23.8567	66.6538	1912	H. Möller	B3965	0	1	0	0
N	Norrbotten, Övertorneå sn., Övertorneå, kyrkogården (26N70)	23.6564	66.3905	1929	Larsson, P. A.	B3966	1	0	0	0
N	Norrbotten, Övertorneå sn., Övertorneå. 1.7 km V om kyrkan [26M79]	23.6117	66.391	1967	Oskar Lönnqvist 5245	B168248	0	1	0	0
N	Pite Lappmark, Arjeplog sn., Lul. Istjakk, sydbrant	17.7472	66.2021	1918	Johansson, H. E.	B3967	0	0	1	0
N	Pite Lappmark, Arjeplog, i Skärfaåives bergrot	17.8925	66.4566	1918	H. E. Johansson	B17127	1	0	0	0
N	Pite Lappmark, Arjeplog, Ikesjaureområdet, Muoranjuonje	15.8833	66.7667	1932	T. & A. Arwidsson	B17125	0	0	1	0
N	Pite Lappmark, Arjeplog, Lake Mavasjaure, S shore near mount Årjon Saulo (27G44-).	16.1667	66.8833	1960	Gillis Een	B87963	1	0	0	0
N	Pite Lappmark, Arjeplog, N of Mávasjávrre, at small lake N of Lake Guhkajávrátj, 620 m a.s.l.	16.3929	66.923	2015	Lars Hedenäs, Göran Odelvik, Martin Westberg	B227716	1	0	0	0
N	Pite Lappmark, Arjeplog, N of Mávasjávrre, Mt. Lulep Guhkavárddo, 740 m a.s.l.	16.3186	66.9161	2015	Lars Hedenäs, Göran Odelvik, Martin Westberg	B223747	1	0	0	0
N	Pite Lappmark, Arjeplog, N of Mávasjávrre, Mt. Lulep Guhkavárddo, 740 m a.s.l.	16.3185	66.9164	2015	Lars Hedenäs, Göran Odelvik, Martin Westberg	B227701	1	0	0	0
N	Pite lappmark, Arjeplog, SE slope of Mt. Skärrim, 770 m a.s.l.	15.8695	66.7655	2017	Lars Hedenäs, Göran Odelvik, Martin Westberg	B265736	1	0	0	0
N	Pite Lappmark, Arjeplog, Vuoggatjålmejaur, 750 m a.s.l.	16.2456	66.5792	1918	H. Möller	B17126	0	0	1	0
N	Torne Lappmark, Jukkasjärvi, Abisko nationalpark, Kårsavaggejåkk, S sidan	18.6764	68.3327	1944	S. Arnell & H. Persson	B17143	0	0	1	0
N	Torne Lappmark, Jukkasjärvi, Abisko nationalpark, Nuolja, ovan Ö tunnelmynningen, övre björkreg.	18.7194	68.3848	1944	H. Persson	B17140	0	1	0	0
N	Torne Lappmark, Jukkasjärvi, Abisko nationalpark, Nuolja, översta reg subalp ungefär mitt emellan Nuoljabäcken och tunneln	18.7355	68.3747	1944	H. Persson	B17144	1	0	0	0
N	Torne Lappmark, Jukkasjärvi, Björkliden	18.6851	68.4081	1944	A. Hülphers	B17138	0	0	1	0
N	Torne Lappmark, Jukkasjärvi, Jebrenjokk, reg. bet.	18.9009	68.4441	1911	E. Jäderholm	B17142	1	0	0	0
N	Torne Lappmark, Jukkasjärvi, Junosuando Masugnsbyn	22.0499	67.4518	1941	A. Hülphers	B17149	0	1	0	0
N	Torne Lappmark, Jukkasjärvi, Kopparåsen	18.5105	68.4249	1941	A. Hülphers	B17150	0	0	1	0
N	Torne Lappmark, Jukkasjärvi, Kopparåsen	18.5105	68.4249	1941	A. Hülphers	B17151	0	0	1	0
N	Torne Lappmark, Jukkasjärvi, Kårsavaggejokk, r. betul.	18.6983	68.3318	1917	E. Jäderholm	B17145	1	0	0	0
N	Torne Lappmark, Jukkasjärvi, Masugnsbyn	22.0499	67.4518	1941	W. R. Uggla	B17148	0	1	0	0
N	Torne Lappmark, Jukkasjärvi, Nuolja, reg salic	18.7417	68.3631	1917	E. Jäderholm	B17146	0	1	0	0
N	Torne Lappmark, Jukkasjärvi, O om Japmajaure	18.2182	68.5229	1983	L. Hedenäs	B13979	1	0	0	0
N	Torne Lappmark, Jukkasjärvi, Paddos, reg. bet.	18.8637	68.3194	1916	E. Jäderholm	B17141	1	0	0	0
N	Torne Lappmark, Jukkasjärvi, Paddosvarats, 600 m a.s.l.	18.8637	68.3194	1916	G. Samuelsson	B17139	1	0	0	0
N	Torne Lappmark, Jukkasjärvi, Snurijokk, r. bet.	18.8177	68.4728	1912	E. Jäderholm	B17147	0	1	0	0
N	Torne Lappmark, Jukkasjärvi, Torneträsk area, Björkliden, S of Lake Kratersjön. 600 m a.s.l.	18.625	68.4167	2017	Lars Hedenäs	B263407	0	0	1	0
N	Torne Lappmark, Jukkasjärvi, Torneträsk area, Björkliden, S of Lake Kratersjön. 620 m a.s.l.	18.623	68.4169	2017	Lars Hedenäs	B263414	1	0	0	0
N	Torne Lappmark, Jukkasjärvi, Torneträsk area, Vassijaure, NE slope of Vássečohka. 910 m a.s.l.	18.2955	68.3996	2017	Lars Hedenäs	B263255	0	1	0	0
N	Torne Lappmark, Jukkasjärvi, W of Nikkaluokta, S slope of Darfálčorru. 910 m a.s.l.	18.6895	67.8738	2017	Lars Hedenäs, Irene Bisang	B254709	1	0	0	0
N	Västerbotten, Burträsk	20.6678	64.5176	1874	C. P. Laestadius	B17131	1	0	0	0
N	Västerbotten, Bygdeå, kyrkogårdsmuren	20.861	64.0621	1923	S. Grapengiesser	B17137	1	0	0	0
N	Västerbotten, Hörnefors, Bjenberg	19.8	63.7033	1940	E. von Krusenstjerna 49	B17133	0	0	1	0
N	Västerbotten, Jörn	20.0413	65.0578	1912	H. Möller	B17134	1	0	0	0
N	Västerbotten, Kåge, Björnmyreberget	20.6603	64.9277	1934	A. Hülphers	B17129	0	0	1	0
N	Västerbotten, Norsjö, along River Petikån downstreams Svanseledammet, 210 m a.s.l.	19.8263	65.0047	2016	Lars Hedenäs, Göran Odelvik	B236837	1	0	0	0
N	Västerbotten, Robertsfors	20.8498	64.1893	1923	S. Grapengiesser 145	B17132	0	0	1	0
N	Västerbotten, Skellefteå, Häbbersfors, Mt. Nedreberget (S of Häbbersberget), 120 m a.s.l.	20.5868	64.9135	2016	Lars Hedenäs, Göran Odelvik	B236881	0	0	1	0
N	Västerbotten, Skellefteå, Kyrkobordet	20.9202	64.7536	1916	G. Samuelsson	B17130	1	0	0	0
N	Västerbotten, Skellefteå, Sandfors, vid stora landsvägen mot björkdal, gräsvall	20.6151	64.909	1942	E. von Krusenstjerna 3	B17128	1	0	0	0
N	Västerbotten, Umeå, vid älven	20.2673	63.8226	1912	H. Möller	B17135	0	0	1	0
N	Ångermanland, Tåsjö, Tåsjö östra by, i liden	15.996	64.1898	1927	G. R. Cedergren	B17091	0	0	1	0
N	Ångermanland, Tåsjö, Tåsjö östra by, i liden upp mot berget	15.996	64.1898	1927	G. R. Cedergren	B17087	0	0	1	0
N	Ångermanland, Tåsjö, Tåsjöberget	15.9302	64.2315	1926	H. Möller	B17092	0	1	0	0
N	Åsele Lappmark, Dorotea, Mt. Kalvberget ca. 9 km WSW of Risbäck, around small lake and in the dolomite escarpment, 64º 44' N, 15º 21' E, 580-640 m a.s.l.	15.35	64.7333	2004	L. Hedenäs	B95258	0	0	1	0
N	Åsele Lappmark, Vilhelmina sn., Klimpen,	14.7605	65.0642	1914	H. Möller	B3968	1	0	0	0
N	Åsele Lappmark, Vilhelmina, Klimpfjäll area, S-facing escarpment near the main road just E of Röberg, 65º 04' N, 15º 01' E, 580-620 m a.s.l.	15.0108	65.0657	2004	L. Hedenäs	B95103	0	1	0	0
C	Bohuslän, Foss, Saltkällan, berg	11.6942	58.438	1936	P. A. Larsson	B12993	1	0	0	0
C	Bohuslän, Skee, torr back vid järnvägen, ej långt från Strömstad	11.2083	58.9352	1917	P. A. Larsson	B12990	1	0	0	0
C	Bohuslän, Tanum, Grebbestad, Otterön	11.2328	58.6581	1939	A. Hülphers	B12989	0	0	1	0
C	Bohuslän, Uddevalla, vid skalbankarna	11.9713	58.3606	1934	E. von Krusenstjerna	B12991	1	0	0	0
C	Dalarna, Avesta, Nybyns ådal	16.1402	60.1446	1912	Alfred Arvén	B16774	0	0	1	0
C	Dalarna, Avesta, Nybyns ådal	16.1402	60.1446	1912	Alfred Arvén	B16863	0	1	0	0
C	Dalarna, Bjursås	15.4507	60.7376	1909	H. Möller	B16317	0	0	1	0
C	Dalarna, Boda s:n, vid Styggforsen	15.1901	61.0059	1933	J. W. Håkanson	B310902	0	0	1	0
C	Dalarna, Boda, Osmundberget	15.2073	61.048	1911	H. Möller	B16775	0	0	1	0
C	Dalarna, Boda, S of Solberga limestone quarry	15.2186	60.9819	2021	Lars Hedenäs	B306435	0	0	1	0
C	Dalarna, Boda, S of the abandoned limestone quarry in Solberga, 300 m a.s.l.	15.2186	60.982	2018	Lars Hedenäs	B282971	0	0	1	0
C	Dalarna, Boda, Solberga limestone quarry	15.2142	60.9822	2021	Lars Hedenäs	B306436	0	1	1	1
C	Dalarna, Boda, Solberga limestone quarry	15.2141	60.9821	2021	Lars Hedenäs	B306467	0	1	1	1
C	Dalarna, Boda, Solberga limestone quarry	15.214	60.9823	2021	Lars Hedenäs	B306478	0	1	1	1
C	Dalarna, Boda, Solberga limestone quarry	15.2142	60.9818	2021	Lars Hedenäs	B306480	0	1	1	1
C	Dalarna, Boda, Solberga limestone quarry	15.2142	60.9822	2021	Lars Hedenäs	B306483	0	1	1	1
C	Dalarna, Boda, Styggforsen	15.1908	61.0051	1930	P. A. Jonson	B16885	1	0	0	0
C	Dalarna, Boda, Styggforsen	15.1908	61.0051	1911	H. Möller	B16772	0	0	1	0
C	Dalarna, Boda, the abandoned limestone quarry in Solberga, 210 m a.s.l.	15.2141	60.982	2018	Lars Hedenäs	B282973	0	1	1	1
C	Dalarna, Boda, the abandoned limestone quarry in Solberga, 220 m a.s.l.	15.2166	60.9838	2018	Lars Hedenäs	B282972	0	1	1	1
C	Dalarna, Floda, Vesenberget	14.8066	60.4859	1912	H. Möller	B16866	1	0	0	0
C	Dalarna, Folkärna, Krylbo	16.212	60.1304	1913	H. Möller	B16860	1	0	0	0
C	Dalarna, Gagnef, Djurmo	15.1908	60.5477	1912	H. Möller	B16870	1	0	0	0
C	Dalarna, Gagnef, Djurås	15.138	60.5593	1912	H. Möller	B16869	1	0	0	0
C	Dalarna, Gagnef, Kom till måtta	15.1051	60.5616	1912	H. Möller	B16873	1	0	0	0
C	Dalarna, Garpenberg, Holmgruvan	16.1725	60.2782	2011	Lars Hedenäs, Göran Odelvik, Elin Ohlsson	B186489	0	0	1	0
C	Dalarna, Garpenberg, N of Garpenbergs gård	16.2037	60.2863	2011	Lars Hedenäs, Göran Odelvik, Elin Ohlsson	B186460	1	0	0	0
C	Dalarna, Garpenberg, the limestone quarry NE of Garpenberg	16.2044	60.3206	2011	Lars Hedenäs, Göran Odelvik, Elin Ohlsson	B186668	0	0	1	0
C	Dalarna, Garpenberg, the limestone quarry NE of Garpenberg	16.2053	60.3206	2011	Lars Hedenäs, Göran Odelvik, Elin Ohlsson	B185221	0	0	1	0
C	Dalarna, Grangärde	14.9816	60.2621	1910	H. Möller	B16874	0	0	1	0
C	Dalarna, Grangärde, Nyhammar	14.9719	60.285	1910	H. Möller	B16871	1	0	0	0
C	Dalarna, Husby sn, 2050 m O om Galnbo, 400 m SSV om Edske masugn, strax N om grusväg, gammal bebyggelse. Rubin: 13G 2e 2913. RT90: 6712966, 1521378.	16.1945	60.5337	2015	Göran Odelvik	B236006	0	0	1	0
C	Dalarna, Husby, Silvhytteå	16.1794	60.4847	2011	Lars Hedenäs, Göran Odelvik, Elin Ohlsson	B186576	0	0	1	0
C	Dalarna, Kopparberg, Grycksbo	15.492	60.6836	1909	H. Möller	B16884	0	0	1	0
C	Dalarna, Leksand, N. Lindberg	15.1235	60.8082	1911	H. Möller	B16881	0	0	1	0
C	Dalarna, Leksand, S. Lindberg	15.1206	60.7989	1911	H. Möller	B16316	0	0	1	0
C	Dalarna, Lima, Limedsforsen	13.3896	60.9001	1904	H. Möller	B16820	0	0	1	0
C	Dalarna, Ludvika, mot Sörvik	15.176	60.1635	1909	H. Möller	B16872	1	0	0	0
C	Dalarna, Malung, Öjsberget, RN: 1391000 / 6740000	13.8054	60.7619	1975	Tomas Hallingbäck, Pell Algot Eriksson 46098	B201850	1	0	0	0
C	Dalarna, Mora, Bergkarlås	14.6317	61.0355	1914	H. Möller	B16810	1	0	0	0
C	Dalarna, Mora, Morkarlby	14.5148	61.0005	1909	H. Möller	B16878	1	0	0	0
C	Dalarna, Mora, Morkarleby	14.5148	61.0005	1914	H. Möller	B16812	1	0	0	0
C	Dalarna, Nittsjö	15.0762	60.936	1983	L. Hedenäs	B13987	0	0	1	0
C	Dalarna, Norrbärke, Gessberg	15.3713	60.249	1913	H. Möller	B16815	0	0	1	0
C	Dalarna, Norrbärke, Jätturn	15.2759	60.2685	1918	G. Cedergren	B16880	0	0	1	0
C	Dalarna, Norrbärke, Schisshyttan	15.2745	60.2213	1913	H. Möller	B16875	1	0	0	0
C	Dalarna, Norsberget	15.0919	60.1188	1979	L. Hedenäs	B13983	1	0	0	0
C	Dalarna, Ore	15.1716	61.1377	1910	H. Möller	B16771	1	0	0	0
C	Dalarna, Ore, Dalfors	15.401	61.2121	1913	O. Vesterlund	B16811	0	0	1	0
C	Dalarna, Ore, Dalfors	15.401	61.2121	1910	H. Möller	B16814	0	1	1	0
C	Dalarna, Ore, Furudal	15.1326	61.1705	2021	Lars Hedenäs	B306465	1	0	0	0
C	Dalarna, Ore, Furudals bruk	15.1742	61.1959	1912	herb. E. Eriksson	B16813	0	0	1	0
C	Dalarna, Ore, W to NW of Fjäckan, 270 m a.s.l.	15.1269	61.1209	2018	Lars Hedenäs	B282967	0	0	1	0
C	Dalarna, Orsa kyrkogård	14.6142	61.1246	1910	H. Möller	B16823	0	1	0	0
C	Dalarna, Orsa vid ån	14.6094	61.1226	1910	Hjalmar Möller	B16826	0	1	1	1
C	Dalarna, Rättvik	15.0977	60.8907	1908	H. Möller	B16776	1	0	0	0
C	Dalarna, Rättvik, E of Rättvik church	15.1001	60.8921	2021	Lars Hedenäs	B306471	0	0	1	0
C	Dalarna, Rättvik, Kullsbergs kalkbrott	15.1037	60.9477	1943	E. von Krusenstjerna	B16322	1	0	0	0
C	Dalarna, Rättvik, Västgärda	15.1054	60.8306	1911	H. Möller	B16773	0	0	1	0
C	Dalarna, Rättvik, W of Fyrklövern	15.1318	60.8803	2021	Lars Hedenäs	B306476	0	0	1	0
C	Dalarna, Rättvik, W of Nittsjö	15.0671	60.9212	2021	Lars Hedenäs	B306464	1	0	0	0
C	Dalarna, Silvberg, Polackshusen	15.4956	60.359	1913	H. Möller	B16868	0	0	1	0
C	Dalarna, St. Skedvi, Kvista	15.7937	60.4121	1909	H. Möller	B16859	1	0	0	0
C	Dalarna, St. Tuna, Kvarnsveden	15.4097	60.5234	1910	H. Möller	B16865	1	0	0	0
C	Dalarna, St. Tuna, Repbäcken	15.3437	60.5143	1911	H. Möller	B16867	1	0	0	0
C	Dalarna, St. Tuna, Tuna-Hästberg	15.1942	60.3365	1927	H. E. Johansson	B16876	0	0	1	0
C	Dalarna, Sundborn	15.7809	60.6563	1908	H. Möller	B16320	1	0	0	0
C	Dalarna, Säfsnäs, Tyfors	14.2169	60.1508	1920	R. Florin	B16882	0	0	1	0
C	Dalarna, Särna, Fjätelfven	13.2635	61.6896	1909	H. Möller	B16818	0	0	1	0
C	Dalarna, Särna, kyrkbacken	13.1398	61.6944	1909	H. Möller	B16819	0	1	0	0
C	Dalarna, Särna, sjöstranden	13.1428	61.6951	1909	H. Möller	B16816	0	0	1	0
C	Dalarna, Säter	15.7475	60.3453	1909	H. Möller	B16770	1	0	0	0
C	Dalarna, Säter, Bispberget	15.8156	60.3567	1909	H. Möller	B16883	0	0	1	0
C	Dalarna, Säter, Bispbergsby	15.7864	60.3591	1912	H. Möller	B16769	0	0	1	0
C	Dalarna, Säter, i dalen	15.7643	60.3546	1912	H. Möller	B16767	1	0	0	0
C	Dalarna, Säter, Pungmakarbo	15.8173	60.3441	1912	H. Möller	B16768	0	1	0	0
C	Dalarna, Söderbärke, Nyfors	15.2893	59.984	1986	L. Hedenäs	B16323	1	0	0	0
C	Dalarna, Torsång, Kyna	15.586	60.5048	1912	H. Möller	B16864	1	0	0	0
C	Dalarna, Transtrand, kyrkbyn	13.3129	61.0877	1926	B. Hederén	B16862	1	0	0	0
C	Dalarna, Transtrand, mellan Fulunäs och Larsbo	13.1287	61.2997	1909	H. Möller	B16817	0	1	1	0
C	Dalarna, Venjan, Johannisholm	14.1247	60.8281	1913	O. Vesterlund	B16809	0	0	1	0
C	Dalarna, Vika	15.7085	60.5138	1913	H. Möller	B16861	1	0	0	0
C	Dalarna, Vika, Knifvadalen	15.7824	60.564	1914	H. Möller	B16858	0	0	1	0
C	Dalarna, Vika, Långtjärn	15.8119	60.5264	1910	H. Möller	B16321	1	0	0	0
C	Dalarna, Ål, Oxberg	15.3793	60.676	1914	H. Möller	B16319	0	0	1	0
C	Dalarna, Älvdalen, Digerberget	13.8436	61.2822	1918	O. Vesterlund	B16824	0	0	1	0
C	Dalarna, Älvdalen, kyrkbyn	14.0426	61.2264	1913	O. Vesterlund	B16825	1	0	0	0
C	Dalarna, Älvdalen, kyrkogårdsmuren	14.0409	61.2258	1909	H. Möller	B16822	0	0	1	0
C	Dalarna, Älvdalen, Porfyrverket	14.0327	61.2144	1909	H. Möller	B16821	0	0	1	0
C	Dalsland, Brålanda, Stommen, backsluttning vid Dalbergså nära kyrkan	12.3805	58.5693	1929	P. A. Larsson	B13453	1	0	0	0
C	Dalsland, Bäcke, Björtveten	12.1901	58.7888	1913	S. & C. Bergström	B13456	0	0	1	0
C	Dalsland, Bäcke, Bäcken	12.2001	58.7798	1917	S. & C. Bergström	B13577	1	0	0	0
C	Dalsland, Bäcke, Bäcken	12.2001	58.7798	1916	S. Bergström	B13572	1	0	0	0
C	Dalsland, Bäcke, Bäcken	12.2001	58.7798	1913	S. & C. Bergström	B13574	0	0	1	0
C	Dalsland, Bäcke, Regineberg	12.2289	58.7708	1913	S. & C. Bergström	B13578	1	0	0	0
C	Dalsland, Bäcke, Regineberg, vid Damtjärnsbäcken	12.2301	58.7703	1933	S. Bergström	B13596	0	0	1	0
C	Dalsland, Bäcke, Stora Ödegården	12.1888	58.7762	1917	S. & C. Bergström	B13567	0	0	1	0
C	Dalsland, Dals-Ed, Bälnäs, berg nära Stora Le	11.9327	58.9234	1916	S. Bergström	B13571	0	0	1	0
C	Dalsland, Dalskog, Berga	12.2881	58.7503	1913	S. Berström	B13454	0	0	1	0
C	Dalsland, Dalskog, Halängen, ovanför "Bergtränget"	12.2635	58.7578	1915	S. Bergström	B13576	0	0	1	0
C	Dalsland, Ed, Kalslätt	11.9633	58.8952	1918	S. Bergström	B13565	0	0	1	0
C	Dalsland, Edsleskog, Bräcke	12.483	59.047	1913	P. A. Larsson	B13583	0	0	1	0
C	Dalsland, Edsleskog, Kyrkoherdebostället, vid torpet Kenäs, berg vid Edslarn	12.4635	59.0577	1916	P. A. Larsson	B13589	1	0	0	0
C	Dalsland, Fröskog, Kristinedal	12.4814	58.9767	1933	P. A. Larsson	B13455	1	0	0	0
C	Dalsland, Gulleberg	12.4701	58.7946		L. Dalman	B13570	0	1	1	1
C	Dalsland, Holm, Framnäs, berg vid sjön Nären	12.4465	58.7497	1919	S. Berström	B13568	0	0	1	0
C	Dalsland, Holm, på Långön vid Köpmannebro	12.5086	58.7686	1916	P. A. Larsson	B13590	1	0	0	0
C	Dalsland, Laxarby, Heden, Kushålet	12.3738	59.0246	1922	P. A. Larsson	B13595	1	0	0	0
C	Dalsland, Laxarby, Kroken	12.2968	59.027	1915	G. Hellsing	B13573	0	0	1	0
C	Dalsland, Laxarby, Stommen, Limugnen	12.3537	59.063	1923	P. A. Larsson	B13579	1	0	0	0
C	Dalsland, Mo, Öjersbyn	12.6665	59.0914	1913	P. A. Larsson	B13458	0	0	1	0
C	Dalsland, Mo, Öjersbyn	12.6665	59.0914	1912	P. A. Larsson	B13569	0	0	1	0
C	Dalsland, Nössemark, Räsviken	11.8238	59.1175	1932	S. Bergström	B13575	0	0	1	0
C	Dalsland, Skållerud, Ryr	12.4845	58.8063	1927	S. Bergström	B13566	0	0	1	0
C	Dalsland, Skållerud, Snäcke	12.4967	58.8278	1912	P. A. Larsson	B13582	1	0	0	0
C	Dalsland, Steneby, Jepplanda	12.2507	58.9316	1914	P. A. Larsson	B13593	0	0	1	0
C	Dalsland, Tisselskog, Heden	12.3295	58.8649	1932	S. Bergström	B13581	1	0	0	0
C	Dalsland, Tisselskog, Stommen, vid kyrkogården	12.3945	58.9099	1922	P. A. Larsson	B13580	1	0	0	0
C	Dalsland, Torp, Ellenö	11.9801	58.5134	1916	P. A. Larsson	B13584	1	0	0	0
C	Dalsland, Torrskog, Nästegård	12.0981	59.1793	1929	P. A. Larsson	B13592	0	0	1	0
C	Dalsland, Töftedal, Mon, berg vid Charlotten	12.4827	58.8566	1925	P. A. Larsson	B13591	1	0	0	0
C	Dalsland, Vårvik, Stommen, berg vid kyrkan	12.21	59.1829	1927	P. A. Larsson	B13586	1	0	0	0
C	Dalsland, Åmål, på ön Fogden i Vänern	12.7379	59.0307	1919	P. A. Larsson	B13564	0	0	1	0
C	Dalsland, Åmål, Årbol, berg nära Vänern	12.7083	59.0782	1922	P. A. Larsson	B13457	0	0	1	0
C	Dalsland, Ånimskog, Henriksholm	12.5271	58.903	1915	P. A. Larsson	B13594	0	1	0	0
C	Dalsland, Ärtemark, Huvudging	12.2057	59.0184	1917	P. A. Larsson	B13585	1	0	0	0
C	Gästrikland, Gävle	17.1355	60.6731	1863	H. Thedenius	B16853	0	0	1	0
C	Gästrikland, Gävle	17.1355	60.6731	1863	P. A. Westling	B16856	0	0	1	0
C	Gästrikland, Gävle, Heliga trefaldighets församling, Norrlandet, 1700 m. NO om Engeltofta, Brädviken, strax N om sandstrand. 13H 6f 4044. 6734057, 1579495.	17.2626	60.7158	2004	G. Odelvik & B. Hellström	B102980	1	0	0	0
C	Gästrikland, Gävle, nära Sandsborg	17.1355	60.6731	1862	H. Thedenius	B16855	0	0	1	0
C	Gästrikland, Gävle, Orarna	17.3025	60.6756	2018	Lars Hedenäs	B282962	0	0	1	0
C	Gästrikland, Hedesunda sn, Hyttön, vid bron över flottningsrännan. RUBIN 13H 1g 4320	17.2987	60.4934	2002	G. Odelvik & R. Karlsson	B79819	0	0	1	0
C	Gästrikland, Ovansjö, Storvik	16.5366	60.5825	1912	H. Möller	B16854	0	1	1	0
C	Gästrikland, Torsåker sn, 1850 m. VNV om Edskevallen, N om Edsken, strax S om damm, Edske masugn, hyttruin. 13G 2e 3315. GPS: EPE 9, 1521514, 6713302	16.197	60.5366	2003	Göran Odelvik	B87359	0	0	1	0
C	Gästrikland, Torsåker sn, 2400 m. SV om Torsåkers kyrka, 1150 m. NNV om Anders-Ols, O om väg 68, före detta kalkbrott. 13G 1h 3302. 6708331, 1535246.	16.4456	60.4906	2006	Göran Odelvik	B116413	0	0	1	0
C	Gästrikland, Torsåker sn, 4050 m NNV om Torsåkers kyrka, Vibyhyttan, strax SO om hyttruin, strax O om grusväg. 13G 2h 4203. 6714248, 1535317.	16.4483	60.5438	2008	Göran Odelvik	B148589	1	0	0	0
C	Gästrikland, Torsåker sn, Hofors, 2100 m NNV om Hofors kyrka, Övre Robertsholm, 450 m O-OSO om järnvägsstation, mellan järnvägen och Bruksvägen, bangårdsområde. 13G 3f 1907. 6716907, 1525716.	16.2741	60.5688	2009	Göran Odelvik	B165710	0	0	1	0
C	Gästrikland, Torsåker sn, Kratte masugn, hyttruin. 13G 0g 3916. 6703945, 1531646.	16.3784	60.4518	2005	G. Odelvik & B. Hellström	B107659	0	0	1	0
C	Gästrikland, Torsåker sn, Körbergsklack, f. d. kalkbrott, c. 400 m. OSO om toppen	16.4255	60.5348	2000	Göran Odelvik	B43795	1	0	0	0
C	Gästrikland, Torsåker sn, Skommarhyttan, vid hyttruin, liten kulle. RUBIN 13G 0h 0240	16.5162	60.4193	2002	G. Odelvik & B. Hellström	B79820	0	0	1	0
C	Gästrikland, Torsåker sn, Vall, Valls kalkbrott, c. 3000 m. SV om Torsåkers kyrka, S om Igeltjärnen, kalkbrottets O-ände, vid Igeltjärnen. RUBIN 13G 1g 3046	16.4354	60.4882	2001	G. Odelvik	B69003	1	0	0	0
C	Gästrikland, Torsåker sn, Vibyhyttan, hyttruin. RUBIN 13G 2h 4303	16.4477	60.544	2001	G. Odelvik & B. Hellström	B76407	1	0	0	0
C	Gästrikland, Torsåker, Hofors	16.2929	60.545	1912	H. Möller	B16852	0	0	1	0
C	Gästrikland, Torsåker, SE slope of Körbergsklack, 150 m a.s.l.	16.4255	60.5348	2004	L. Hedenäs	B96455	0	0	1	0
C	Gästrikland, Valbo sn, Grinduga, Orarna, före detta bebyggelse. 13H 5g 4618. GPS: EPE 5, 1581836, 6729651	17.3024	60.6755	2003	Göran Odelvik	B87421	1	0	0	0
C	Gästrikland, Valbo, Furuvik	17.3339	60.6547	1908	H. Möller	B16851	1	0	0	0
C	Gästrikland, Valbo, Hemlingby	17.1686	60.6513	1942	E. von Krusenstjerna 140	B16857	1	0	0	0
C	Gästrikland, Österfärnebo sn, Österfärnebo, strax N om Österfärnebo kyrka. 12H 7a 2546. 6687572, 1554662.	16.7938	60.3026	2008	Göran Odelvik	B148586	1	0	0	0
C	Hälsingland, Bollnäs	16.3889	61.3464	1910	Hjalmar Möller	B16841	1	0	0	0
C	Hälsingland, Delsbo, Gryttjesberget,	16.325	61.7985	1996	Tomas Hallingbäck 1536	B201842	0	1	0	0
C	Hälsingland, Forsa sn, Blacksås	16.7667	61.6333	1990	Mats H. G. Gustafsson s.n.	B152010	0	1	0	0
C	Hälsingland, Gnarp, W portion of Mt. Uvberget (near Gnarp)	17.1969	62.0585	2010	Lars Hedenäs	B175732	0	1	0	0
C	Hälsingland, Helsingtuna	17.0802	61.7541	1907	Sven Brun	B16848	0	0	1	0
C	Hälsingland, Hudiksvall	17.1033	61.7258	1911	A. J. Nordström	B16838	1	0	0	0
C	Hälsingland, Hudiksvall, S face of Köpmanberget	17.1306	61.7217	2009	Mats H. G. Gustafsson 1095	B176107	0	0	1	0
C	Hälsingland, Hudiksvall, Tunaberget	17.0896	61.7445	1911	Alfr. Nordström	B16837	0	0	1	0
C	Hälsingland, Hälsingtuna, Tunaborg	17.0747	61.9317	2008	Mats H. G. Gustafsson 787	B173824	0	0	1	0
C	Hälsingland, Järvsö	16.1794	61.7088	1924	R. Florin	B16839	0	0	1	0
C	Hälsingland, Norrala sn, 4650 m. SO om Norrala kyrka, Vågbro, 1050 m. V om Tjärnvik.	17.0477	61.331	2007	Göran Odelvik	B122891	1	0	0	0
C	Hälsingland, Norrbonäset, Norrbo	16.6482	61.8718	1951	Zander Säfvenstam	B16849	0	0	1	0
C	Hälsingland, paroec. Ängersjö, Getbacken	14.8647	61.9824	1902	Magnus Östman	B16842	0	0	1	0
C	Hälsingland, paroec. Ängersjö, Kvarnberget	14.9135	61.9711	1897	Magnus Östman	B16844	0	0	1	0
C	Hälsingland, paroec. Ängersjö, Kvarnberget	14.9135	61.9711	1896	Magnus Östman	B16847	0	0	1	0
C	Hälsingland, paroec. Ängersjö, Turagården	14.867	61.9821	1902	Magnus Östman	B16845	0	0	1	0
C	Hälsingland, paroec. Ängersjö, Vänsjö	15.013	61.995	1899	Magnus Östman	B16846	1	0	0	0
C	Hälsingland, paroec. Ängersjö, Ängersjö	14.8654	61.9821	1897	Magnus Östman	B16843	0	0	1	0
C	Hälsingland, Söderhamn, 550 m. SSV om Söderhamns kyrka, Västra Berget, toppen, vid torn.	17.0444	61.2991	2007	Göran Odelvik	B122892	0	0	1	0
C	Hälsingland, Öster prästgården, Njutånger	17.0495	61.6185	1951	Zander Säfvenstam	B16850	1	0	0	0
C	Härjedalen, Hede, Medskogen, monte Ulvberget	13.6026	62.4174	1920	M. Östman	B16896	1	0	0	0
C	Härjedalen, Hede, vid bron över Ljungan	13.5198	62.4224	1946	O. H. Selling	B16900	0	0	1	0
C	Härjedalen, Lillhärdal, just S-SE of church, 460 m a.s.l.	14.0703	61.8517	2018	Lars Hedenäs, Göran Odelvik, Martin Westberg	B282947	1	0	0	0
C	Härjedalen, Linsell, kyrkbyn	13.8825	62.1583	1972	B. Danielsson	B16899	1	0	0	0
C	Härjedalen, Stor-Mittåkläppens SV-brant, 1100 m a.s.l.	12.4437	62.7297	1982	L. Hedenäs	B13974	0	0	1	0
C	Härjedalen, Storsjö	13.0561	62.8019	1965	Kai Wigh 406	B279665	0	0	1	0
C	Härjedalen, Storsjö, Ljungdalsforsen, 600 m a.s.l.	12.7644	62.8649	1931	R. Florin	B16938	0	0	1	0
C	Härjedalen, Storsjö, Mt. Stor-Axhögen, S side, below 2nd highest peak, 1125 m a.s.l.	12.5469	62.7528	2007	Lars Hedenäs	B122250	1	0	0	0
C	Härjedalen, Storsjö, Mt. Stor-Axhögen, S slope below 2nd highest peak, 1070 m a.s.l.	12.5417	62.7531	2007	Lars Hedenäs	B122929	0	1	0	0
C	Härjedalen, Storsjö, Storsjö Kapell, vid gästgivaregården	13.0579	62.8017	1941	E. von Krusenstjerna 14	B16901	0	0	1	0
C	Härjedalen, Sveg, Duvberg	14.2649	62.1073	1890	S. J. Enander	B16941	1	0	0	0
C	Härjedalen, Tännäs, 15 km SSE Tännäs and der Str. 311, c. 30 km SSE Funäsdalen, S-exp Felswand an E-ende des Fraesjön, 62 22' N, 14 48' E, 700 m a.s.l., Birken-Fichtenwald	12.7869	62.3683	1981	J.-P. Frahm	B16898	0	1	0	0
C	Härjedalen, Tännäs, ca. 1 km E of Ytteränget, beside road to Vivallen, 645 m a.s.l.	12.4793	62.5573	2002	L. Hedenäs	B75516	1	0	0	0
C	Härjedalen, Tännäs, Funäsdalen	12.5415	62.5475	1905	M. Östman	B16939	0	0	1	0
C	Härjedalen, Tännäs, Funäsdalsberget	12.5341	62.5522	1946	O. H. Selling	B16897	0	0	1	0
C	Härjedalen, Tännäs, Funäsdalsberget	12.5341	62.5522	1936	T. G. Halle	B16940	0	0	1	0
C	Härjedalen, Tännäs, Mt. Ramundberget, the E-facing, largest escarpment, 860 m a.s.l.	12.3958	62.6867	2007	Lars Hedenäs	B122261	0	0	1	0
C	Härjedalen, Tännäs, N portion of escarpment above (S of) Ramundberget, 860 m a.s.l.	12.3943	62.6901	2014	Lars Hedenäs	B207494	0	1	1	1
C	Härjedalen, Tännäs, NW portion of top plateau of Mt. Kliehpie (Stor-Mittåkläppen), 1170 m a.s.l.	12.4489	62.732	2014	Lars Hedenäs	B207566	0	0	1	0
C	Härjedalen, Tännäs, Ramundberget, W of Gruvstugan, 870 m a.s.l.	12.4078	62.705	2014	Lars Hedenäs	B207519	0	0	1	0
C	Härjedalen, Tännäs, S-most slope of Mt. Vegarsberget, 62º 27’ N, 12º 42’ E, 660 m a.s.l.	12.7	62.45	2005	L. Hedenäs	B104226	0	0	1	0
C	Härjedalen, Tännäs, Stor-Mittåkläppen, östra sidan	12.4552	62.7323	1990	N. Hakelier	B16895	0	0	1	0
C	Härjedalen, Tännäs, Tännäsbergets sydbranter	12.6875	62.4431	1919	G. R. Cedergren	B16937	1	0	0	0
C	Härjedalen, Älvros, S part of Remmen, 425 m a.s.l.	14.7022	62.015	2007	Lars Hedenäs, Göran Odelvik, Monika Myrdal	B121288	0	0	1	0
C	Härjedalen, Älvros, Älvroshamrar	14.6814	62.0595	1900	M. Östman	B16936	0	0	1	0
C	Härjedalen, Överhogdal, the earlier Överhogdal railway station, 300 m a.s.l.	14.8054	62.2671	2018	Lars Hedenäs, Göran Odelvik, Martin Westberg	B282950	1	0	0	0
C	Härjedalen, Överhogdal, Överhogdal forngård, 290 m a.s.l.	14.7859	62.2951	2016	Lars Hedenäs	B238798	0	0	1	0
C	Jämtland, Alsen, Bräckeberget	14.0067	63.3861	1944	R. Florin	B16927	0	0	1	0
C	Jämtland, Alsen, Helleberg (Häljeberg) vid Åringsån	13.8708	63.4107	1944	R. Florin	B16923	0	0	1	0
C	Jämtland, Alsen, Rödeberget	14.0826	63.3583	1944	R. Florin	B16928	1	0	0	0
C	Jämtland, Alsen, Rödeberget, vid landsvägskanten, klippa, ca 350 / 1413500 / 7029000	14.0764	63.3595	2002	Tomas Hallingbäck 38168	B201843	0	0	1	0
C	Jämtland, Berg	14.4514	62.8118	1912	A. Grape	B16934	0	0	1	0
C	Jämtland, Berg, Skucku, 350 m a.s.l.	14.5059	62.7894	1916	G. Åberg	B16931	1	0	0	0
C	Jämtland, Brunflo	14.8234	63.089	1908	A. Grape	B16915	0	1	1	0
C	Jämtland, Brunflo, Brunflo churchyard	14.8184	63.0914	2020	Lars Hedenäs, Irene Bisang	B299297	0	1	1	1
C	Jämtland, Brunflo, N of Södergård	14.8113	63.0948	2020	Lars Hedenäs, Irene Bisang	B299296	0	0	1	0
C	Jämtland, Brunflo, S of Torvalla	14.7254	63.1388	2020	Lars Hedenäs, Irene Bisang	B299290	0	0	1	0
C	Jämtland, Brunflo, shore of Lake Storsjön, W of Ope gård	14.7641	63.1245	2020	Lars Hedenäs, Irene Bisang	B300381	0	0	1	0
C	Jämtland, Brunflo, shore of Lake Storsjön, W of Optand	14.7711	63.1185	2020	Lars Hedenäs, Irene Bisang	B300378	0	0	1	0
C	Jämtland, Brunflo, Svedjefors	15.0061	62.9642	2021	Lars Hedenäs, Irene Bisang	B305308	0	1	0	0
C	Jämtland, Brunflo, W of Knöva, Åslätte	14.9762	62.9908	2021	Lars Hedenäs, Irene Bisang	B305310	0	1	0	0
C	Jämtland, Brunflo, W of Optand	14.7733	63.1198	2020	Lars Hedenäs, Irene Bisang	B299295	0	0	1	0
C	Jämtland, Frösön	14.5975	63.183	1910	H. Möller	B16917	1	0	0	0
C	Jämtland, Frösön, Fillsta	14.5347	63.153	1921	T. G. Halle	B16905	0	0	1	0
C	Jämtland, Frösön, nära kyrkan	14.5203	63.1794	1915	H. Möller	B16902	1	0	0	0
C	Jämtland, Frösön, Öneberget	14.5939	63.1695	1910	H. Möller	B16914	0	1	0	0
C	Jämtland, Hoverberget	14.4363	62.83	1916	G. Cedergren	B17033	0	0	1	0
C	Jämtland, Häggenås, vid stationen	14.8806	63.386	1914	H. Möller	B16910	1	0	0	0
C	Jämtland, Kall, along lake Kallsjön, 0.7 km SW to 1.4 km SSW of Bratteggen, 63º 26’ N, 13º 22’ E, 385 m a.s.l.	13.3667	63.4333	2005	Lars Hedenäs	B104944	0	0	1	0
C	Jämtland, Kall, around abandoned small farm 700 m ESE of Mt. Stavattsberget, 63º 28’ N, 13º 20’ E, 400 m a.s.l.	13.3333	63.4667	2005	Lars Hedenäs	B104939	0	0	1	0
C	Jämtland, Kall, around abandoned small farm 700 m ESE of Mt. Stavattsberget, 63º 28’ N, 13º 20’ E, 400 m a.s.l.	13.3333	63.4667	2005	Lars Hedenäs	B105094	1	0	0	0
C	Jämtland, Kall, Ytterkonäs, nära stranden	13.0546	63.6009	1924	T. G. Halle	B16926	1	0	0	0
C	Jämtland, Lockne, Böle	14.9402	63.0196	1936	G. Öhrstedt	B17041	0	1	1	0
C	Jämtland, Norderö	14.3604	63.149	1915	F. Behm	B16916	0	0	1	0
C	Jämtland, Norderö	14.3604	63.149	1910	F. Behm	B17037	1	0	0	0
C	Jämtland, Norderö, Ufön	14.2325	63.1758	1914	F. Behm	B16913	1	0	0	0
C	Jämtland, Offerdal, Änge	14.0667	63.4564	1944	R. Florin	B16922	0	1	0	0
C	Jämtland, Ovikens sn., Botåsbacken	14.4	62.982	1865	Fl. Behm	B16933	0	1	1	1
C	Jämtland, Ragunda	16.3989	63.0597	1888	C. O. Strömholm	B16930	0	0	1	0
C	Jämtland, Ragunda sn., Mt. Prästberget, 130 m a.s.l.	16.3816	63.1004	2014	Lars Hedenäs	B204261	0	1	1	1
C	Jämtland, Ragunda sn., Mt. Stadsberget, E side of Nabben, 210 m a.s.l.	16.0329	63.1382	2014	Lars Hedenäs	B205104	0	1	1	0
C	Jämtland, Ragunda sn., S end of Mt. Degerberget, 340 m a.s.l.	16.0848	63.152	2014	Lars Hedenäs	B204291	0	0	1	0
C	Jämtland, Ragunda sn., S escarpment of Mt. Krokvågsberget, 200 m a.s.l.	16.2788	63.1572	2014	Lars Hedenäs	B204317	0	0	1	0
C	Jämtland, Ragunda, Prästberget	16.3747	63.1024	1925	S. Grapengiesser	B17043	0	1	0	0
C	Jämtland, Ragunda, Städsberget, 225 m a.s.l.	16.0328	63.1382	1913	G. Åberg	B16932	1	0	0	0
C	Jämtland, Stugun, ad templum vetus	15.5842	63.1682	1921	G. Öhrstedt	B17039	0	0	1	0
C	Jämtland, Stugun, Stuguberget, ovanför Vågslätten, 300 m a.s.l.	15.5691	63.1731	1912	G. Åberg	B16918	0	1	0	0
C	Jämtland, Stugun, Stugubyn, 220 m a.s.l.	15.6069	63.1681	1912	G. Åberg	B16929	0	0	1	0
C	Jämtland, Sundsjö, Börjesjö	15.3685	63.0332	1943	F. O. Österlind	B16920	1	0	0	0
C	Jämtland, Sundsjö, Fanbyn, vid nya vägen söder om Stortjärn	15.1257	62.9558	1941	F. O. Österlind	B17030	0	0	1	0
C	Jämtland, Sundsjö, Holmsjö, höjd 408 Ö om Stugutjärnarna	15.4465	62.964	1942	F. O. Österlind	B16921	0	1	1	0
C	Jämtland, Sundsjö, Landsom, S om Tjärnsved	15.2284	62.9451	1942	F. O. Österlund	B16919	0	0	1	0
C	Jämtland, Sundsjö, Marsätt, vid Sundsjö-stranden	15.1318	62.9825	1941	F. O. Österlind	B17035	0	0	1	0
C	Jämtland, Sundsjö, Mjösjö, vid bäcken fr. Gårdstjärn	15.2538	63.0384	1942	F. O. Österlind	B17027	0	0	1	0
C	Jämtland, Sundsjö, Samsta, vid bäcken från Gårdstjärn	15.084	63.009	1941	F. O. Österlind	B17031	0	0	1	0
C	Jämtland, Sundsjö, Stamnäs, norr gården	15.1663	62.9584	1942	F. O. Österlind	B17032	0	0	1	0
C	Jämtland, Undersåker, ad Järpen	13.4707	63.3421	1917	G. Öhrstedt	B16912	0	0	1	0
C	Jämtland, Åre, Duved, Prästgården	12.93	63.3929	1933	C. Stenholm	B17040	0	0	1	0
C	Jämtland, Åre, Enafors, Övre Handölsforsen, ca 600 m ö h, RN: 1331000 / 7020000	12.4399	63.2494	1976	Tomas Hallingbäck 46097	B201849	0	0	1	0
C	Jämtland, Åre, Mörviksugu	13.0826	63.4121	1903	C. Brandel	B16909	1	0	0	0
C	Jämtland, Åre, Storlien, i ravinen	12.0952	63.3203	1922	S. Medelius	B17038	1	0	0	0
C	Jämtland, Åre, the escarpment just NW of the old Storlien village, 610 m a.s.l.	12.0989	63.3214	2007	Lars Hedenäs	B122295	0	1	0	0
C	Jämtland, Åre, Tronåset-Vik	13.1296	63.3857	1903	C. Brandel	B16925	1	0	0	0
C	Jämtland, Åre, vid platån	13.0756	63.4275	1903	C. Brandel	B16911	1	0	0	0
C	Jämtland, Åre, Ånnsjön, Bunnerviken	12.5535	63.2294	1984	L. Hedenäs	B13978	1	0	0	0
C	Jämtland, Åre, Åreskutan	13.0883	63.4222	1902	C. Brandel	B17026	1	0	0	0
C	Jämtland, Ås, Kattstrupsforsen	14.5788	63.3255	1938	F. O. Österlind	B16924	0	1	0	0
C	Jämtland, Åsarna, Storhallen, 400 m a.s.l.	14.2863	62.6864	1920	G. Åberg	B17042	0	1	1	0
C	Medelpad, Alnön	17.4082	62.4464	1874	H. W. Arnell	B17100	1	0	0	0
C	Medelpad, Alnön, Släta	17.4517	62.4439	1890	E. Collinder	B17101	1	0	0	0
C	Medelpad, Borgsjö, just E of Erikslund, 120 m a.s.l.	15.9219	62.5257	2019	Lars Hedenäs	B291936	1	0	0	0
C	Medelpad, Borgsjö, Mt. Bergåsen escarpment, 380 m a.s.l.	15.9191	62.5514	2019	Lars Hedenäs	B291942	0	1	0	0
C	Medelpad, Borgsjö, NW of Husmyran, 250 m a.s.l.	15.7874	62.5814	2019	Lars Hedenäs	B291945	0	0	1	0
C	Medelpad, Borgsjö, SE of Borgsjöbyn, 120 m a.s.l.	15.9241	62.5357	2019	Lars Hedenäs	B291934	0	0	1	0
C	Medelpad, Borgsjö, SE-facing escarpment of Mt. Öberget, 62º 31’ N, 16º 00’ E, 220 m a.s.l.	16	62.5167	2006	Lars Hedenäs	B115547	0	0	1	0
C	Medelpad, Borgsjö, Ånge	15.648	62.523	1943	E. Wall 192	B17103	1	0	0	0
C	Medelpad, Hässjö, Gökböle	17.5451	62.532	1910	K. B. Nordström	B17102	1	0	0	0
C	Medelpad, Indal, c. 2 km SE of Indal, W side of N end of bridge across river	17.1247	62.558	2013	Lars Hedenäs	B198534	0	0	1	0
C	Medelpad, Liden, Dacke, 650-700 m SSE of Sillre såg	16.7394	62.7429	2013	Lars Hedenäs	B198581	0	0	1	0
C	Medelpad, Liden, Dacke, S escarpment of Sandrisberget	16.7243	62.7528	2013	Lars Hedenäs	B198547	0	0	1	0
C	Medelpad, Ljustorps kyrka	17.3335	62.6253	1910	K. B. Nordström	B17098	1	0	0	0
C	Medelpad, Stöde, Flyggberget, 100 m a.s.l.	16.5383	62.4208	2019	Lars Hedenäs	B291940	0	0	1	0
C	Medelpad, Stöde, Flyggberget, 140 m a.s.l.	16.5395	62.4201	2019	Lars Hedenäs	B291938	0	0	1	0
C	Medelpad, Sundsvall	17.2989	62.391	1877	K. A. T. Seth	B17096	0	0	1	0
C	Medelpad, Sundsvall	17.2989	62.391	1864	A. Fredriksson	B17095	1	0	0	0
C	Medelpad, Sundsvall, N. Stadsberget	17.2899	62.3994	1921	H. Möller	B17097	0	0	1	0
C	Medelpad, Torp, Ljungaverk, E end of Västerhångsta, 62º 30’ N, 16º 05’ E, 85 m a.s.l.	16.0833	62.5	2006	Lars Hedenäs	B115529	0	0	1	0
C	Medelpad, Torp, Ljungaverk, Mt. Getberget, W part of the S-facing escarpment, 62º 30’ N, 16º 05’ E, 220 m a.s.l.	16.0833	62.5	2006	Lars Hedenäs	B115533	0	0	1	0
C	Medelpad, Torp, Rosenhill	16.172	62.4956	1886	H. W. Arnell	B17094	1	0	0	0
C	Medelpad, Torp, vid Byforsen	16.1193	62.492	1987	L. Hedenäs	B17099	0	0	1	0
C	Medelpad, Torp, Åse, at and below the S-SE-facing escarpment of Mt. Åseberget, 62º 32’ N, 16º 04’ E, 190 m a.s.l.	16.0667	62.5333	2006	Lars Hedenäs	B115555	0	0	1	0
C	Ner., Axberg, Qvinnerstatorp	15.2423	59.3577	1885	K. Kjellmark	B13815	0	1	1	1
C	Närke, Asker, Odensbacke	15.5259	59.1626	1887	P. Sjöholm	B13608	0	0	1	0
C	Närke, Axberg	15.2149	59.3616	1888	K. Kjellmark	B13611	0	1	0	0
C	Närke, Axberg, Dylta	15.2295	59.4196	1861	C. Hartman	B13804	0	0	1	0
C	Närke, Axberg, Dylta Bruks station	15.2408	59.3891	1888	K. Kjellmark	B13817	1	0	0	0
C	Närke, Axberg, Kvinnerstatorp	15.2423	59.3577	1885	K. Kjellmark	B13612	0	1	0	0
C	Närke, Edsberg, Riseberga	14.894	59.1547	1889	G. A. Ringselle	B13609	0	0	1	0
C	Närke, Glanshammar	15.4017	59.3192	1889	E. Persson	B13812	0	0	1	0
C	Närke, Glanshammar, c. 600 m Ö om kyrkan	15.411	59.3191	1993	N. Hakelier	B13613	0	0	1	0
C	Närke, Hallsberg, Skallerudsdalen	15.0793	59.0438	1913	T. Rydén	B13808	0	0	1	0
C	Närke, Hammar, Bastedalen	14.9336	58.785	1873	C. Hartman	B13614	1	0	0	0
C	Närke, Hardemo	15.0055	59.1057	1853	O. G. Blomberg	B13618	1	0	0	0
C	Närke, Hidinge, Garphyttans nationalpark	14.8865	59.2789	1939	H. Persson & S. Waldheim	B13616	1	0	0	0
C	Närke, Hovsta, Långstryr	15.1775	59.3399	1932	S. Waldheim	B13617	0	1	0	0
C	Närke, Kringlaskogen	15.2443	59.312	1888	G. Ek	B13811	0	0	1	0
C	Närke, Kumla, Hovsta af Kräklinge	14.9833	59.1729	1880	J. W. Rosendahl	B13807	0	0	1	0
C	Närke, Kumla, Yxhult	15.2303	59.1134	1918	C. Stenholm	B13806	1	0	0	0
C	Närke, Kumla, Yxhult	15.2303	59.1134	1874	C. Hartman	B13814	1	0	0	0
C	Närke, Kvistbro, Rymningsgruvan	14.7088	59.1782	1934	S. Waldheim	B13810	1	0	0	0
C	Närke, N om Örebro, Åsarna	15.2282	59.3694	1928	S. Waldheim	B13621	0	0	1	0
C	Närke, Rinkaby, Kolja	15.3614	59.3032	1889	E. Persson	B13802	1	0	0	0
C	Närke, Stora Mellösa, Norra Grundholmen i Hjälmaren	15.7024	59.245	1904	S. Birger	B13619	0	0	1	0
C	Närke, Viby, Tystingsberget	14.9715	59.0339	1853	P. Z.	B13816	1	0	0	0
C	Närke, Vintrosa, Berga, Krontorp, i kalkbrottet	14.9678	59.2694	1933	S. Waldheim	B13805	1	0	0	0
C	Närke, Vintrosa, Hässelkulla	15.0166	59.2408	1932	S. Waldheim	B13620	0	0	1	0
C	Närke, Örebro	15.2279	59.2723	1897	C. Stenholm	B13813	1	0	0	0
C	Närke, Örebro	15.2279	59.2723	1887	G. A. Ringselle	B13803	1	0	0	0
C	Närke, Örebro	15.2279	59.2723	1868	J. J. Johansson	B13610	0	0	1	0
C	Närke, Örebro, S om Örebro, vid gamla Masåvägen	15.1572	59.2438	1932	S. Waldheim	B13809	0	0	1	0
C	Stockholm	18.0548	59.3412	1850	Fr. Björnström	B15347	0	1	1	1
C	Södermanland, Björkvik, Hjulbonäs	16.3416	58.8373	1918	H. Hesselman	B14711	0	0	1	0
C	Södermanland, Björnlunda sn., Vagnön	17.091	59.038	1993	Hans Rydberg	B203373	1	0	0	0
C	Södermanland, Brännkyrka, Blecktornet på Söder	18.0859	59.3068	1861	S. Henschen	B14716	0	0	1	0
C	Södermanland, Brännkyrka, Orhem	18.1361	59.2473	1920	H. Möller	B14502	0	0	1	0
C	Södermanland, Brännkyrka, Skarpnäck	18.1463	59.2682	1920	H. Möller	B14702	0	0	1	0
C	Södermanland, Dalarö	18.4173	59.1378	1888	M. Huss	B14718	0	0	1	0
C	Södermanland, Frustuna, nära kyrkan	17.3078	59.0581	1927	R. Florin	B14791	1	0	0	0
C	Södermanland, Halla sn, Sund.	16.6315	58.8381	1958	Oscar Palmgren	B191843	1	0	0	0
C	Södermanland, Helgesta, Ängö i Båven, södra delen	16.9461	59.0234	1955	T. E. Hasselrot	B14714	1	0	0	0
C	Södermanland, Huddinge, Huddinge prästgård	17.9861	59.2396	1857	E. Ährling	B14511	0	0	1	0
C	Södermanland, Huddinge, Länna	18.1096	59.192	1981	L. Hedenäs	B14520	1	0	0	0
C	Södermanland, Huddinge, Syd Ågesta kraftverk	18.0789	59.2041	1973	Gunnar Holmbring	B280090	0	0	1	0
C	Södermanland, Husby Rekarna, Ryninge	16.4501	59.3176	1879	H. Forsell	B14704	0	0	1	0
C	Södermanland, Hölö, Fridön	17.6185	58.9428	1915	E. Asplund	B14710	0	1	0	0
C	Södermanland, Hölö, Tullgarn	17.5844	58.9517	1974	A. Anderberg 149	B14517	0	0	1	0
C	Södermanland, Julita, nära Fisktorp	16.1097	59.151	1861	herb. H. von Post	B14501	0	0	1	0
C	Södermanland, Julita, Äs	16.1097	59.151	1861	H. v. Post	B14701	1	0	0	0
C	Södermanland, kalkbrottet i Vårdinge	17.3941	59.0377	1977	Anders Delin	B263689	0	0	1	0
C	Södermanland, Katrineholm	16.2052	58.999	1925	H. Möller	B14507	1	0	0	0
C	Södermanland, Kattnäs	17.2955	59.0797	1927	R. Florin	B14790	0	0	1	0
C	Södermanland, Kärnbo, Gripsholm	17.2194	59.2561	1903	H. Möller	B14513	1	0	0	0
C	Södermanland, Mariefred	17.2245	59.2585	1929	E. Florin	B14798	0	0	1	0
C	Södermanland, Mörkö, Hörningsholm	17.6674	59.0499	1919	R. Florin	B14797	0	0	1	0
C	Södermanland, Mörkö, Oaxen, N end of island	17.7147	58.9826	2020	Lars Hedenäs	B299314	1	0	0	0
C	Södermanland, Mörkö, Söräng	17.6938	58.9692	1985	L. Hedenäs	B14521	1	0	0	0
C	Södermanland, Nacka	18.1453	59.3074	1902	H. Möller	B14516	1	0	0	0
C	Södermanland, Nyköping	17.0161	58.7506	1862	C. Indebetou	B14708	0	0	1	0
C	Södermanland, Nynäshamn, Käringboda Naturreservat, 500 m W of Fagersund	17.8892	58.8692	2013	Lars Hedenäs	B196238	0	0	1	0
C	Södermanland, Nämdö sn, Nämdö böte. På kalkklipporna vid båtbryggan.	18.7405	59.2088	1977	Thomas Karlsson	B74355	1	0	0	0
C	Södermanland, Nämdö, Nämndö Böte	18.7412	59.2086	1986	L. Hedenäs	B14931	0	0	1	0
C	Södermanland, Nämndö, Mörtö	18.6199	59.1555	1929	R. Florin	B14793	0	0	1	0
C	Södermanland, Ornö, Kråkmora, N om Hålsjön	18.3847	59.048	1982	L. Hedenäs	B13984	1	0	0	0
C	Södermanland, Ornö, Långbäling	18.3887	58.994	1915	H. Hesselman	B14712	0	0	1	0
C	Södermanland, Salem, Korpberget	17.6196	59.2505	1918	H. Möller	B14512	1	0	0	0
C	Södermanland, Salem, Viksberg	17.6132	59.2497	1918	H. Möller	B14514	0	0	1	0
C	Södermanland, Saltsjöbaden, Erstaviken, Neglinge	18.2528	59.2702	1901	H. Möller	B14506	0	0	1	0
C	Södermanland, Saltsjöbaden/Nacka, Neglinge Lund	18.2617	59.2828	1901	H. Möller	B14503	0	1	0	0
C	Södermanland, Sorunda, just E of Stora Vika limestone quarry	17.8024	58.9454	2002	L. Hedenäs	B69209	0	0	1	0
C	Södermanland, Sorunda, Karta	17.7297	58.8909	1985	L. Hedenäs	B14518	1	0	0	0
C	Södermanland, Sorunda, Stora Vika	17.7976	58.9493	1985	L. Hedenäs	B14519	1	0	0	0
C	Södermanland, Sorunda, Stora Vika	17.7976	58.9493	1933	R. Florin	B14505	0	0	1	0
C	Södermanland, Sorunda, Stora Vika, S Dammen	17.802	58.9358	2009	Lars Hedenäs	B169645	0	0	1	0
C	Södermanland, St. Malm	16.3509	58.894	1934	E. von Krusenstjerna	B14522	0	0	1	0
C	Södermanland, Stockholm, Danvikskroken	18.1024	59.3149	1864	A. Fredriksson	B14717	1	0	0	0
C	Södermanland, Stockholm, Söderbergen	18.051	59.3202	1914	R. Florin	B14508	1	0	0	0
C	Södermanland, Strängnäs, Bresshammar	17.0276	59.3936	1903	C. Lindman	B14706	0	0	1	0
C	Södermanland, Svärta, Svärtagård	17.0937	58.8196	1929	R. Florin	B14795	0	0	1	0
C	Södermanland, Södertälje	17.6267	59.198	1831	S. Hardin	B14509	0	0	1	0
C	Södermanland, Torö, Lilludden	17.8224	58.849	1940	R. Florin	B14878	1	0	0	0
C	Södermanland, Torö, vid kyrkan	17.8413	58.8406	1940	R. Florin	B14882	0	0	1	0
C	Södermanland, Trosa	17.5443	58.8979	1922	H. Möller	B14715	0	0	1	0
C	Södermanland, Trosa, Tureholm	17.518	58.8951	1922	H. Möller	B14709	0	0	1	0
C	Södermanland, Trosa-Vagnhärad, Lövsta, 300 m ESE of Stensborg	17.4227	58.9685	2011	Lars Hedenäs	B185461	1	0	0	0
C	Södermanland, Trosa-Vagnhärad, Lövsta, E of Sandbrink	17.4094	58.9694	2011	Lars Hedenäs	B185447	0	0	1	0
C	Södermanland, Trosa-Vagnhärad, Vagnhärad, ca. 600 m SE of Fänsåker	17.4824	58.9502	2012	Lars Hedenäs	B192233	0	0	1	0
C	Södermanland, Turinge, Nykvarn	17.4302	59.1777	1933	R. Florin	B14500	0	0	1	0
C	Södermanland, Tyresö, bergvägg 1 km S om Tyresö kyrka	18.3009	59.2268	1942	O. H. Selling	B14879	0	0	1	0
C	Södermanland, Tyresö, nära slottet	18.3043	59.2353	1937	C. A. Tärnlund	B14504	0	0	1	0
C	Södermanland, Utö	18.3233	58.9681	1927	H. Möller	B14515	0	0	1	0
C	Södermanland, Utö	18.3233	58.9681	1923	R. Florin	B14789	0	0	1	0
C	Södermanland, Utö	18.3233	58.9681	1921	H. Möller	B14707	0	0	1	0
C	Södermanland, Utö	18.3233	58.9681		S. Borgström	B14523	0	0	1	0
C	Södermanland, Utö, c. 1 km VSV Norrby	18.2442	58.9409	1940	R. Florin	B14881	0	0	1	0
C	Södermanland, Utö, hill at Korsby hage	18.2588	58.9409	2016	L. Hedenäs	B240770	0	0	1	0
C	Södermanland, Utö, in the wood by Bodsundet opposite L. Persholmen	18.3156	58.9667	1965	E. Nyholm 65/42,3	B14713	1	0	0	0
C	Södermanland, Utö, Kroka	18.3621	58.9777	1940	R. Florin	B14877	1	0	0	0
C	Södermanland, Utö, Källviksberget	18.2306	58.9255	2013	Lars Hedenäs	B198257	0	0	1	0
C	Södermanland, Utö, Utö, Byle	18.2567	58.9359	1940	R. Florin	B14876	1	0	0	0
C	Södermanland, Utö, Utö, Ängsberget (40-metersberget) vid Källvik	18.229	58.9289	1941	R. Florin	B14880	1	0	0	0
C	Södermanland, Utö, vid gruvan	18.3295	58.9664	1927	H. Möller	B14875	1	0	0	0
C	Södermanland, Utö, Ålö nature reserve, W-SW slope of Kinnekulle	18.2171	58.9245	2010	Lars Hedenäs	B175667	1	0	0	0
C	Södermanland, Vagnhärad, Källvik	17.4872	58.7806	1903	H. W. Arnell	B14510	0	0	1	0
C	Södermanland, Vårdinge, 750 m W of Sjunda	17.3357	59.0851	2001	L. Hedenäs	B55417	0	0	1	0
C	Södermanland, Vårdinge, along Lake Sillen, SW of Usta	17.365	59.0109	2019	Lars Hedenäs	B290655	1	0	0	0
C	Södermanland, Vårdinge, Molstaberg, W of Saltkällan	17.3802	59.0808	2020	Lars Hedenäs	B300386	0	0	1	0
C	Södermanland, Vårdinge, Mölnbo marmorbrott, N of the Mölnbo-Gnesta road	17.3955	59.0416	2000	I. Bisang	B32400	0	0	1	0
C	Södermanland, Vårdinge, Sjunda	17.3459	59.0841	1927	R. Florin	B14792	0	0	1	0
C	Södermanland, Vårdinge, SW end of Lake Långsjön, Viknäsudden and E-wards	17.43	58.9953	2019	Lars Hedenäs	B290648	1	0	0	0
C	Södermanland, Vårdinge, SW-S of Usta along Lake Sillen	17.3605	59.014	2021	Lars Hedenäs	B304792	1	0	0	0
C	Södermanland, Vårdinge, SW-S of Usta along Lake Sillen	17.3615	59.0124	2021	Lars Hedenäs	B304798	1	0	0	0
C	Södermanland, Vårdinge, Usta	17.3658	59.0158	1927	R. Florin	B14796	0	0	1	0
C	Södermanland, Västerhaninge, E of Dikartorp SW of Lake Träsksjön	18.0012	59.0563	2012	Lars Hedenäs	B191574	1	0	0	0
C	Södermanland, Västerhaninge, Vitså	18.1323	59.0928	1927	R. Florin	B14794	1	0	0	0
C	Södermanland, Ytterenhörna, c. 300 m SW of Varnberga	17.4634	59.2656	2022	Lars Hedenäs	B309516	1	0	0	0
C	Södermanland, Ö Vingåker, Bånneråd nära Krämbol	16.1264	58.9831	1936	S. Waldheim	B14499	1	0	0	0
C	Södermanland, Ösmo, Bedarö, södra delen	17.9599	58.8874	1941	A. Silfversparre	B14705	0	0	1	0
C	Södermanland, Ösmo, Gryt	17.9064	58.9729	1983	L. Hedenäs	B13975	1	0	0	0
C	Södermanland, Ösmo, Hammersta, around N end of Lake Maren	18.0073	59.0145	2011	Lars Hedenäs	B186184	0	0	1	0
C	Södermanland, Ösmo, Ängnö	17.9135	58.9821	1878	herb. H. Forsell	B14703	1	0	0	0
C	Södermanland, Österhaninge, S side of Kikarberg (near road)	18.1553	59.1305	2016	Lars Hedenäs	B236514	1	0	0	0
C	Södermanland, Österhaninge, Årsta slott	18.1945	59.1073	1982	L. Hedenäs	B13986	0	1	0	0
C	Södermanland, Östra Vingåker, 300 m W of Virenshult	16.1142	58.9867	2022	Lars Hedenäs	B311059	0	0	1	0
C	Södermanland, Överenhörna, Al	17.4357	59.253	2022	Lars Hedenäs	B309445	1	0	0	0
C	Södermanland, Överenhörna, SSE of the church	17.4045	59.2991	2022	Lars Hedenäs	B309521	1	0	0	0
C	Uppland, Adelsö, Björkö	17.5568	59.3319	1925	H. Möller	B15161	0	0	1	0
C	Uppland, Angarn, Åstad	18.1508	59.5372	1927	R. Florin	B16250	0	0	1	0
C	Uppland, Biskopskulla, Lilla Berg	17.2592	59.7131	1922	E. Almquist	B14924	1	0	0	0
C	Uppland, Blidö, Yxlan, Vagnsunda	18.7808	59.5812	1945	A. Jansson	B15427	0	0	1	0
C	Uppland, Bo, Nybacka	18.2607	59.3246	1923	R. Florin	B15168	0	0	1	0
C	Uppland, Bondkyrka, Flogsta	17.5914	59.849	1916	G. R. Cedergren	B15432	1	0	0	0
C	Uppland, Bondkyrka, Flottsund	17.661	59.7893	1890	R. Fries	B15162	0	0	1	0
C	Uppland, Bondkyrka, Gottsunda	17.6156	59.8103	1892	Erik Nyman	B15007	0	0	1	0
C	Uppland, Bondkyrka, Norrby	17.6046	59.8304	1936	M. E. Fries	B14927	0	1	1	0
C	Uppland, Bro, vid kyrkan	17.6264	59.5055	1928	R. Florin	B16284	1	0	0	0
C	Uppland, Bromma, på vallen vid kyrkan	17.9201	59.3543	1851	Fr. Björnström	B15013	0	1	1	1
C	Uppland, Bromma, Traneberg	17.9877	59.3377	1911	G. Lundqvist	B14957	1	0	0	0
C	Uppland, Bällinge, Svista, i Folkarby	17.5991	59.9344	1929	C. A. Tärnlund	B15258	0	0	1	0
C	Uppland, Danderyd, 350 m. SE of Mörby trainstation	18.05	59.3899	1947	Gillis Een	B50470	0	1	1	0
C	Uppland, Danderyd, Bergendal	17.9819	59.4311	1918	R. Florin	B16288	1	0	0	0
C	Uppland, Danderyd, Djursholm	18.0899	59.401	1925	A. Uggla	B14953	1	0	0	0
C	Uppland, Danderyd, Djursholm	18.0899	59.401	1917	H. Möller	B16285	1	0	0	0
C	Uppland, Danderyd, Djursholm near border to Stocksund	18.0667	59.3918	1945	Gillis Een	B50373	1	0	0	0
C	Uppland, Danderyd, Långängen	18.0757	59.3823	1918	H. Möller	B15008	0	0	1	0
C	Uppland, Danderyd, Nora	18.016	59.4068	1924	H. Möller	B15158	0	0	1	0
C	Uppland, Danderyd, Näsby	18.0876	59.4248	1927	R. Florin	B15166	1	0	0	0
C	Uppland, Danderyd, Ösby	18.0541	59.3994	1925	H. Möller	B16326	1	0	0	0
C	Uppland, Danmark, Linnés Hammarby	17.7756	59.8174	1922	H. Möller	B15263	0	0	1	0
C	Uppland, Dannemora, nära sjön	17.8503	60.1751	1966	K.-G. Rydling	B203463	1	0	0	0
C	Uppland, Djurö sn., Runmarö, Långvik	18.781	59.2936	1924	A. Hülphers	B14959	0	1	1	1
C	Uppland, Djurö, Harö	18.8976	59.3386	1922	A. Hülphers	B14956	1	0	0	0
C	Uppland, Djurö, Munkö	18.7177	59.2365	1920	H. Möller	B15160	0	0	1	0
C	Uppland, Djurö, Runmarö	18.7596	59.279	1925	A. Hülphers	B14955	0	0	1	0
C	Uppland, Djurö, Runmarö	18.7596	59.279	1924	A. Hülphers	B16244	1	0	0	0
C	Uppland, Djurö, Runmarö	18.7596	59.279	1890	C. G. Hoffstein	B16295	0	1	0	0
C	Uppland, Djurö, Runmarö	18.7596	59.279	1882	K. F. Thedenius	B15352	0	1	0	0
C	Uppland, Djurö, Runmarö, mellan Söderby och Vånö	18.758	59.262	1939	T. G. Halle	B14928	1	0	0	0
C	Uppland, Djurö, Runmarö, NO om Uppebyträsk	18.7753	59.2791	1986	L. Hedenäs	B14926	1	0	0	0
C	Uppland, Djurö, Runmarö, Rissleskär	18.716	59.2512	1921	H. Möller	B15154	1	0	0	0
C	Uppland, Djurö, Runmarö, Södersunda	18.7436	59.2706	1917	H. Möller	B16290	0	0	1	0
C	Uppland, Djurö, Runmarö, Uppeby	18.7638	59.2814	1921	E. Almquist	B14973	0	0	1	0
C	Uppland, Djurö, Runmarö, Uppeby	18.7638	59.2814	1919	R. Florin	B14968	1	0	0	0
C	Uppland, Djurö, Runmarö, Viträsk	18.7612	59.2696	1921	E. Almquist	B16301	1	0	0	0
C	Uppland, Djurö, Storön, W of Käringsberget, 20 m a.s.l.	18.7183	59.2652	2014	Lars Hedenäs	B208351	1	0	0	0
C	Uppland, Ed, Edsby	17.8647	59.5103	1927	R. Florin	B15283	1	0	0	0
C	Uppland, Edebo, Lövgrön	18.5294	60.007	1927	R. Florin	B15178	1	0	0	0
C	Uppland, Film, Dannemora	17.8624	60.1999	1893	G. Hellsing	B16327	0	0	1	0
C	Uppland, Fresta, Fornboda	17.9764	59.4836	1927	R. Florin	B15177	0	1	0	0
C	Uppland, Frösunda	18.1676	59.6218	1928	R. Florin	B15167	0	0	1	0
C	Uppland, Frötuna, kyrkomuren	18.6759	59.741	1932	Agelin	B15339	0	1	0	0
C	Uppland, Fundbo, Halleqved	17.8694	59.8613	1928	R. Florin	B16253	1	0	0	0
C	Uppland, Gryta, Salnecke park	17.3383	59.7395	1942	E. von Krusenstjerna 178	B15429	1	0	0	0
C	Uppland, Gustafsberg, Långsunda	18.4058	59.3494	1957	E. von Krusenstjerna 41	B15431	1	0	0	0
C	Uppland, Hammarby	17.7755	59.8209	1965	K. Wigh 629	B280094	1	0	0	0
C	Uppland, Hammarby, Wik	17.9384	59.5354	1929	R. Florin	B16251	1	0	0	0
C	Uppland, Harga, Tvärnö, SÖ sidan	18.5511	60.1935	1935	T. G. Halle	B15094	0	0	1	0
C	Uppland, Husby, Märsta	17.8476	59.6346	1903	O. Ekstam	B15093	0	0	1	0
C	Uppland, Husby-Sjuhundra, Sättralund	18.5408	59.7633	1985	L. Hedenäs	B14932	0	0	1	0
C	Uppland, Ingarö, 0,5 km SV om Henriksdal	18.3856	59.2872	1981	L. Hedenäs	B13976	1	0	0	0
C	Uppland, Ingarö, Kolström	18.3936	59.2894	1923	R. Florin	B15163	1	0	0	0
C	Uppland, Järfälla, Gåsberget	17.7642	59.3998	1858	herb. Retzius	B14965	0	0	1	0
C	Uppland, Knutby, gamla kalkbrottet vid västra stranden av Hosjön	18.3057	59.9246	1942	T. G. Halle	B15430	0	0	1	0
C	Uppland, Kårsta, nära Kårsta järnvägsstation	18.2685	59.6569	1927	R. Florin	B15179	0	0	1	0
C	Uppland, Lidingö, backen vid elverket	18.154	59.3685	1933	J. W. Håkanson	B310903	0	0	1	0
C	Uppland, Lidingö, Fjäderholmarna	18.1771	59.3283	1928	R. Florin	B15171	0	1	0	0
C	Uppland, Lidingö, Grönsta	18.1563	59.3795	1928	H. Möller	B15159	1	0	0	0
C	Uppland, Ljusterö, Hallonstenarna	18.8741	59.5219	1919	A. Hülphers	B16248	0	0	1	0
C	Uppland, Ljusterö, Kornäs	18.5487	59.4285	1928	H. Möller	B16283	0	0	1	0
C	Uppland, Ljusterö, Linanäs	18.5176	59.4735	1928	C. A. Tärnlund	B15416	0	0	1	0
C	Uppland, Lossa, Toresta hållplats	17.5726	59.5344	1921	E. Almquist	B16305	1	0	0	0
C	Uppland, Lossa, vid kyrkan	17.5657	59.5091	1928	R. Florin	B16287	0	0	1	0
C	Uppland, Lovö, Drottningholm	17.883	59.3225	1927	R. Florin	B15172	0	0	1	0
C	Uppland, Lovö, Drottningholm	17.883	59.3225	1918	C. A. Tärnlund	B15345	1	0	0	0
C	Uppland, Lovö, Drottningholm, China slott	17.8785	59.3174	1858	S. O. Lindberg	B15342	0	1	1	1
C	Uppland, Läby, Kvarnbo	17.5609	59.8449	1881	E. Vetterhall	B15350	0	1	0	0
C	Uppland, Länna, Bergshamra, Österviken	18.6831	59.639	1932	T. G. Halle	B14963	0	0	1	0
C	Uppland, Länna, Slängbodaströmmens västra strand, norra delen	18.6653	59.6176	1941	R. Florin	B15358	0	0	1	0
C	Uppland, Länna, vid Bergshamraviken mellan Mora och Slängsboda	18.6637	59.6303	1943	T. G. Halle	B15426	1	0	0	0
C	Uppland, Markim, Vivelstad	18.061	59.5971	1929	R. Florin	B16254	0	1	1	1
C	Uppland, Möja, Lilla Möja, branter i Norrskog, nära Verksundet	18.8574	59.4039	1919	T. Vestergren	B14960	0	0	1	0
C	Uppland, Möja, Lilla Möja, Norrskog	18.8574	59.4039	1926	T. Vestergren	B15090	0	0	1	0
C	Uppland, Norrtälje, Sessön	18.7513	59.7635	1930	Agelin	B14969	0	0	1	0
C	Uppland, Närtuna, Berga	18.2485	59.689	1942	T. G. Halle	B16243	0	0	1	0
C	Uppland, Närtuna, Berga	18.2485	59.689	1928	R. Florin	B15284	0	0	1	0
C	Uppland, Närtuna, Eriksberg	18.2494	59.6926	1942	T. G. Halle	B16247	1	0	0	0
C	Uppland, Närtuna, Malmby	18.2317	59.6931	1928	R. Florin	B15287	0	0	1	0
C	Uppland, Närtuna, Malmby	18.2317	59.6931	1928	R. Florin	B16324	1	0	0	0
C	Uppland, O om Rosersberg, Ström	17.9096	59.5823	1981	L. Hedenäs	B13981	0	0	1	0
C	Uppland, Orkesta, Lindholmens gård	18.1277	59.5833	1927	R. Florin	B15286	1	0	0	0
C	Uppland, Orkesta, Lindholmens gård	18.1277	59.5833	1927	R. Florin	B16280	0	0	1	0
C	Uppland, prope Uppsala	17.6363	59.8538	1862	F. Behm	B14923	0	1	0	0
C	Uppland, Runmarö	18.7596	59.279	1891	C. G. Hoffstein	B16294	0	1	1	1
C	Uppland, Rådmansö, N om Rävsnäs	19.0834	59.7575	1934	T. G. Halle	B14962	0	0	1	0
C	Uppland, Rådmansö, Orrnäs-Gillberga	18.9897	59.7373	1934	T. G. Halle	B14967	1	0	0	0
C	Uppland, Rö, Beateberg	18.4191	59.6595	1928	R. Florin	B15181	0	0	1	0
C	Uppland, Rö, Rö	18.3895	59.6967	1928	R. Florin	B15176	1	0	0	0
C	Uppland, Singö, Alskär	18.7868	60.2105	1935	T. G. Halle	B15099	0	0	1	0
C	Uppland, Singö, Ellan	18.7405	60.2067	1935	T. G. Halle	B15253	0	1	0	0
C	Uppland, Singö, Enkholmen	18.7866	60.1738	1923	G. A. Ringselle	B15340	0	1	0	0
C	Uppland, Singö, halvön Ö om Enholmsfjärden, dioritstråket	18.7922	60.1736	1935	T. G. Halle	B15250	0	1	1	1
C	Uppland, Singö, mellan Boda och Nyvärna	18.7356	60.1972	1923	G. A. Ringselle	B16331	0	0	1	0
C	Uppland, Singö, Norrvreta, kalkstråket	18.7276	60.1688	1935	T. G. Halle	B15098	0	0	1	0
C	Uppland, Singö, nära Borgsbäcken	18.7423	60.1613	1924	G. A. Ringselle	B15096	1	0	0	0
C	Uppland, Singö, Ramsan	18.6989	60.187	1935	T. G. Halle	B15248	0	0	1	0
C	Uppland, Singö, SO om Kittelörsundet	18.7891	60.1899	1935	T. G. Halle	B15249	0	0	1	0
C	Uppland, Sollentuna, Edsberg	17.9547	59.4408	1921	H. Möller	B16336	0	1	0	0
C	Uppland, Sollentuna, Landsnora	17.9621	59.4386	1962	E. von Krusenstjerna	B14951	1	0	0	0
C	Uppland, Solna, Carlbergs skog	18.0182	59.3437		J. E. Wikström	B15011	0	0	1	0
C	Uppland, Solna, Solna kyrkogård	18.0252	59.3533	1851	F. Björnström	B14964	0	1	1	1
C	Uppland, Spånga, Akalla	17.91	59.4121	1963	E. von Krusenstjerna	B14950	1	0	0	0
C	Uppland, St. Olof, Löfstaholm	17.7451	59.6563	1926	H. Möller	B15261	0	0	1	0
C	Uppland, Sthlm., Gåsberget i Järfälla sn.	17.7642	59.3998	1853	S. O. Lindberg & C. G. Göthe	B15256	0	1	1	1
C	Uppland, Stockholm	18.0548	59.3412	1879	K. F. Thedenius	B15182	0	0	1	0
C	Uppland, Stockholm	18.0548	59.3412	1868	H. Thedenius	B15346	1	0	0	0
C	Uppland, Stockholm	18.0548	59.3412		S. O. Lindberg	B15343	0	1	1	1
C	Uppland, Stockholm	18.0548	59.3412		C. O. Hamnström	B15359	0	1	0	0
C	Uppland, Stockholm, Bergielund	17.9548	59.3589	1913	R. Florin	B15009	1	0	0	0
C	Uppland, Stockholm, Bergielund	17.9548	59.3589	1913	R. Florin	B15173	1	0	0	0
C	Uppland, Stockholm, Experimentalfältet	18.058	59.3675	1884	H. Forsell	B15364	0	0	1	0
C	Uppland, Stockholm, Kaknäs	18.1437	59.336	1864	A. Fredriksson	B15254	0	0	1	0
C	Uppland, Stockholm, på berget innan Lilla Ropsten	18.1024	59.3564	1868	K. F. Thedenius	B15010	0	1	1	1
C	Uppland, Stockholm, Stadshagen	18.0173	59.3351	1864	C. E. Hamberg	B15252	0	0	1	0
C	Uppland, Stockholms-Näs, Berga	17.716	59.4582	1929	R. Florin	B15169	0	0	1	0
C	Uppland, Stockholms-Näs, Rankhus	17.7658	59.4894	1929	R. Florin	B15165	0	0	1	0
C	Uppland, Stockholms-Näs, Tuna	17.7268	59.4614	1929	R. Florin	B15164	0	0	1	0
C	Uppland, Tolfta prästgård	17.5492	60.3742	1922	S. Medelius	B14954	0	0	1	0
C	Uppland, Tunåsen	17.6221	59.8944	1912	C. Alm	B14958	0	1	1	1
C	Uppland, Täby, Täby	18.0416	59.4398	1928	R. Florin	B15170	0	0	1	0
C	Uppland, Uppsala	17.6363	59.8538	1910	K. G. Alm	B15425	0	1	1	1
C	Uppland, Uppsala	17.6363	59.8538	1890	C. A. Tärnlund	B15421	0	0	1	0
C	Uppland, Uppsala	17.6363	59.8538	1884	E. Jäderholm	B15420	0	0	1	0
C	Uppland, Uppsala	17.6363	59.8538	1882	H. Thedenius	B15353	0	1	0	0
C	Uppland, Uppsala	17.6363	59.8538	1873	A. Magnusson	B15357	0	0	1	0
C	Uppland, Uppsala	17.6363	59.8538	1866	H. Mosén	B15260	0	1	1	0
C	Uppland, Uppsala	17.6363	59.8538	1854	N. C. Kindberg 39	B15285	0	1	1	1
C	Uppland, Uppsala	17.6363	59.8538	1850	J. E. Zetterstedt 22	B15368	0	0	1	0
C	Uppland, Uppsala	17.6363	59.8538	1839	C. F. Nyman	B15362	0	0	1	0
C	Uppland, Uppsala	17.6363	59.8538	1838	C. F. Nyman	B16333	0	0	1	0
C	Uppland, Uppsala	17.6363	59.8538	1822	Laestadius	B15365	0	1	1	1
C	Uppland, Uppsala (Bondkyrka?), Pålacksbacken	17.6475	59.8419	1850	J. E. Zetterstedt	B16337	0	0	1	0
C	Uppland, Uppsala, ad Gottsunda	17.6156	59.8103		G. Forsell	B16286	0	1	1	1
C	Uppland, Uppsala, Gamla Uppsala	17.63	59.8988	1893	H. von Post	B15097	0	0	1	0
C	Uppland, Uppsala, Gottsunda	17.6156	59.8103	1895	A. Tullgren	B15282	0	1	0	0
C	Uppland, Uppsala, Gottsundabergen	17.6156	59.8103	1828	C. G. Myrin	B16297	0	1	1	1
C	Uppland, Uppsala, Gottsundabergen	17.6156	59.8103	1828	Regnell	B16298	0	1	1	1
C	Uppland, Uppsala, Graneberg	17.6347	59.7836	1890	K. R. E. Fries	B15157	1	0	0	0
C	Uppland, Uppsala, Lassby backar	17.6188	59.8457	1892	Erik Nyman	B15004	0	0	1	0
C	Uppland, Uppsala, Lassby backar	17.6188	59.8457	1884	O. F. Andersson	B15006	0	0	1	0
C	Uppland, Uppsala, Norby	17.6046	59.8304	1881	A. Wirén	B15002	0	1	1	1
C	Uppland, Uppsala, Slottsbacken	17.6363	59.8538	1957	M. E. Fries 192	B15338	1	0	0	0
C	Uppland, Uppsala, slottsbacken	17.6363	59.8538	1898	H. Witte	B15348	1	0	0	0
C	Uppland, Uppsala, slottsbacken	17.6363	59.8538	1886	Erik Nyman	B15175	0	1	1	1
C	Uppland, Uppsala, slottsbacken	17.6363	59.8538	1860	J. E. Zetterstedt 344	B15361	0	1	0	0
C	Uppland, Uppsala, slottsbacken	17.6363	59.8538	1839	Herb. H. von Post	B15351	0	0	1	0
C	Uppland, Uppsala, Tunåsen	17.6221	59.8944	1912	C. G. Alm	B16282	0	1	1	1
C	Uppland, Uppsala, vid Eklundshov	17.214	59.9457	1873	P. Thorén	B15355	1	0	0	0
C	Uppland, Uppsalatrakten	17.6363	59.8538	1895	A. Tullgren	B15091	0	0	1	0
C	Uppland, Upsala, på Slottsbacken	17.6363	59.8538	1850	Rob. Hartman	B14921	0	1	1	1
C	Uppland, V. Lövsta sn.	16.8552	59.9394	1870	C. Lénström	B16289	1	0	0	0
C	Uppland, Vada, Seneby	18.1849	59.5629	1927	R. Florin	B15180	0	0	1	0
C	Uppland, Vaksala, Vitulsberg, vid gården	17.6747	59.9084	1919	G. R. Cedergren	B16249	0	1	0	0
C	Uppland, Vallentuna prästgård	18.0739	59.532	1921	E. Almquist	B16300	1	0	0	0
C	Uppland, Vallentuna, Norrtorp	18.1254	59.5564	1928	R. Florin	B16252	1	0	0	0
C	Uppland, Vaxholm	18.3461	59.4036	1923	R. Florin	B16281	0	0	1	0
C	Uppland, Veckholm	17.3243	59.5213	1922	C. A. Tärnlund	B15417	0	0	1	0
C	Uppland, Vårfrukyrka, Boda	17.0279	59.6633	1924	E. Almquist	B14972	1	0	0	0
C	Uppland, Väddö, Backa	18.9395	59.895	1921	E. Almquist	B16299	1	0	0	0
C	Uppland, Väddö, Elmsta	18.8145	59.9734	1924	E. Almquist	B14974	1	0	0	0
C	Uppland, Väddö, Grisslehamn	18.8119	60.0982	1925	H. Möller	B15153	0	0	1	0
C	Uppland, Väddö, Grisslehamn, Byholmen	18.8133	60.1089	1925	H. Möller	B16278	0	0	1	0
C	Uppland, Väddö, Grisslehamn, Kvarnsand	18.8326	60.0801	1925	H. Möller	B16334	0	1	0	0
C	Uppland, Väddö, Grisslehamn, N om Byholma	18.814	60.1104	1937	O. H. Selling	B16246	0	1	0	0
C	Uppland, Väddö, Nothamn	18.8502	60.0279	1921	E. Almquist	B16303	1	0	0	0
C	Uppland, Väddö, Nothamn, Kalkbergen	18.8502	60.0279	2015	Lars Hedenäs	B227325	1	0	0	0
C	Uppland, Värmdö	18.4973	59.3576	1902	R. Ridderstolpe	B15422	0	0	1	0
C	Uppland, Värmdö	18.4973	59.3576	1875	A. Magnusson	B15423	1	0	0	0
C	Uppland, Värmdö, Hasseludden, Nygärdet	18.2442	59.3476	1918	G. O. Malme	B15419	0	0	1	0
C	Uppland, Västland, Väntgrund	17.6603	60.5277	1923	E. Almquist	B14925	1	0	0	0
C	Uppland, Vätö, Skabbholmen	19.0942	59.7931	1901	H. Hesselman	B16329	1	0	0	0
C	Uppland, Wada, Vadaby	18.2011	59.5766	1927	R. Florin	B15255	0	0	1	0
C	Uppland, Älvkarleby	17.4545	60.5729	1914	H. Möller	B15262	0	0	1	0
C	Uppland, Älvkarleby, Billudden	17.5069	60.6551	1934	R. Santesson	B15092	0	0	1	0
C	Uppland, Älvkarleby, Laxön, near shore opposite Flakön	17.4364	60.56	2018	Lars Hedenäs	B282955	0	0	1	0
C	Uppland, Älvkarleby, vid fallet	17.4391	60.5643	1910	H. Möller	B15259	0	0	1	0
C	Uppland, Älvkarleby, Östanå	17.4604	60.567	1944	T. G. Halle	B16293	0	1	0	0
C	Uppland, Ö. Ryd, Rydboholm	18.1863	59.4399	1919	H. Möller	B16291	0	0	1	0
C	Uppland, Öregrund, Klockstapelsberget	18.4392	60.3377	1926	C. Pleijel	B15356	0	1	0	0
C	Uppland, Öregrund, på skäret Lövholmen, SV sidan av kalkbrottet	18.4742	60.3263	1933	E. von Krusenstjerna	B14929	1	0	0	0
C	Uppland, Öregrund, Träskhagen	18.4354	60.3324	1926	C. Pleijel	B16335	0	1	0	0
C	Uppland, Össeby-Garn, Ådra	18.3026	59.5823	1928	R. Florin	B16328	0	0	1	0
C	Uppland, Österåker	18.2836	59.5069	1921	H. Möller	B15155	0	0	1	0
C	Uppland, Österåker, Brevik	18.3627	59.4571	1943	H. Horn af Rantzien	B14952	1	0	0	0
C	Uppland, Österåker, i berget på N:a sidan Hersbacka-viken	18.3967	59.4842	1915	H. E. Johansson	B14970	0	0	1	0
C	Uppland, Österåker, Margretelund	18.3279	59.4723	1924	H. Möller	B15156	0	0	1	0
C	Uppland, Österåker, Runö	18.2874	59.4813	1917	H. Möller	B16325	1	0	0	0
C	Uppland, Österåker, V om Lervik	18.377	59.4547	1915	H. E. Johansson	B14922	1	0	0	0
C	Uppland, Övergran, Kvarnberget	17.3953	59.6619	1921	E. Almquist	B16304	0	0	1	0
C	Uppsala, Gottsundabergen	17.6156	59.8103	1834	Thorsell	B15367	0	1	1	1
C	Upsala slottsbacke	17.6363	59.8538	1886	Erik Nyman	B16332	0	1	1	1
C	Värmland, Brunskog	12.8828	59.6536	1910	H. Möller	B13555	1	0	0	0
C	Värmland, Brunskog, berg vid foten av kyrkan	12.8935	59.6538	1937	E. von Krusenstjerna	B13559	0	0	1	0
C	Värmland, Brunskog, Lilla Skärmnäs	12.9212	59.6019	1927	S. Eriksson	B13556	0	0	1	0
C	Värmland, Filipstad, between Prästbacken and Lerviken (N end of Lake Yngen)	14.3171	59.7838	2010	Lars Hedenäs, Göran Odelvik	B179135	1	0	0	0
C	Värmland, Filipstad, Långban	14.2624	59.8537	2010	Lars Hedenäs, Göran Odelvik	B178571	1	0	0	0
C	Värmland, Filipstad, Saxån	14.3633	59.7903	2010	Lars Hedenäs, Göran Odelvik	B178197	0	0	1	0
C	Värmland, Filipstad, SW of Lake Igeltjärnen, E of Knaggebo	14.2256	59.7283	2010	Lars Hedenäs, Göran Odelvik	B178146	0	0	1	0
C	Värmland, Fryksände, Torsby	12.9971	60.1401	1924	K. Johansson	B13563	0	0	1	0
C	Värmland, Färnebo, Assertjärn	14.2638	59.7145	1937	A. Hülphers	B13547	0	0	1	0
C	Värmland, Färnebo, ett gammalt kalkbrott nära Assertjärn	14.2638	59.7145	1937	P. A. Larsson	B13554	0	0	1	0
C	Värmland, Färnebo, Gruvåsen	14.3608	59.7546	1947	T. G. Halle	B13534	0	0	1	0
C	Värmland, Färnebo, Långbanshyttan, 220 m a.s.l.	14.2608	59.8536	1927	G. Åberg	B13543	1	0	0	0
C	Värmland, Färnebo, Persberg, vid gruvorna	14.2641	59.75	1914	P. A. Larsson	B13551	1	0	0	0
C	Värmland, Gräsmark, Timbonäs, 250 m a.s.l.	12.6953	60.0132	1921	G. Åberg	B13562	0	0	1	0
C	Värmland, Gunnarskog, Ingersbybergets sv-brant (11CNV: x 66308, y 13214; nogr. 500 m)	12.639	59.7542	1984	Sven Fransson 1984/31	B106018	0	1	0	0
C	Värmland, Gunnarskog, Storeberget ösö om Savtjärn i Gårdsås (11CNV: x 66475, y 13321; nogr. 500 m)	12.6645	59.8261	1984	Sven Fransson 1984/308	B106019	0	0	1	0
C	Värmland, Hammarö, 700 m S om Säter	13.541	59.2986	1926	H. E. Johansson	B13537	0	0	1	0
C	Värmland, Hammarö, vid Vänern, ute på Nolgårds udde	13.4989	59.353	1926	H. E. Johansson	B13540	0	0	1	0
C	Värmland, Holmedal, Selen	12.0016	59.4701	1924	K. Johansson	B13553	1	0	0	0
C	Värmland, Karlskoga, Sibbo	14.6397	59.3568	1955	O. Ericsson	B13550	0	0	1	0
C	Värmland, Karlstad	13.4655	59.3825	1900	A. Hülphers	B13544	0	0	1	0
C	Värmland, Karlstad, Kanikenäset	13.5091	59.3712	1899	A. Hülphers	B13560	1	0	0	0
C	Värmland, Kil, på klippsluttningen ovanför Nedre Fryken, V om Skärmasberg	13.3411	59.594	1923	H. E. Johansson	B13536	0	0	1	0
C	Värmland, Kroppa, SO om Assertjärn, mest inom kalkstensområdet	14.2638	59.7145	1947	T. G. Halle	B13539	0	0	1	0
C	Värmland, Lysvik, Kyrkbyn	13.1307	60.0144	1923	G. Åberg	B13561	1	0	0	0
C	Värmland, Nedre Ullerud, vid Gylterud	13.5291	59.5569	1926	H. E. Johansson	B13535	1	0	0	0
C	Värmland, Nordmark, på Limkullen	14.0797	59.8394	1934	P. A. Larsson	B13557	1	0	0	0
C	Värmland, Norra Råda	13.5973	60.0037	1894	H. A. Fröding	B13558	1	0	0	0
C	Värmland, Segerstad, i bergkanten 500 m SV om Randvikens gård	13.3009	59.3693	1926	H. E. Johansson	B13542	0	0	1	0
C	Värmland, Sunne, Gettjärnsklätten (11CNO: x 66450, y 13400; nogr. 500 m)	12.9464	59.8935	1986	Göran Sidenvall	B106020	0	1	0	0
C	Värmland, Sunne, Hedberget	13.091	59.935	1918	A. Hülphers	B13548	0	0	1	0
C	Värmland, Sunne, Hvitteby, in rupibus humosis, 125 m a.s.l.	13.1662	59.8083	1912	H. A. Fröding	B13538	0	0	1	0
C	Värmland, Sunne, Råmyr, 100 m a.s.l.	13.1042	59.8329	1921	G. Åberg	B13549	0	0	1	0
C	Värmland, Tveta, Mossvik	12.8395	59.1419	1906	H. A. Fröding	B13552	0	0	1	0
C	Värmland, Östmark, på Ränneberget	12.6636	60.3297	1936	P. A. Larsson	B13545	0	0	1	0
C	Värmland, Övre Ullerud, i lövskogen vid Torsbergets fot, Ö invid gården Genbäcken (young, un-opened antheridia)	13.5706	59.6522	1926	H. E. Johansson	B13541	0	1	0	0
C	Värmland. Eda, Vittensten, Brattåsgruvan (11CNV: x 66360, y 13077nogr. 200 m)	12.3816	59.7979	1983	Sven Fransson 1983/541a	B107215	1	0	0	0
C	Västergötland, Berg, Billingen, kalklagret	13.7922	58.484	1928	A. Hülphers	B13139	1	0	0	0
C	Västergötland, extra urbem Lidköping	13.1436	58.512		S. J. Lindgren	B13101	0	0	1	0
C	Västergötland, Halleberg, Grytet	12.4957	58.3771	1939	G. Svensson	B13108	1	0	0	0
C	Västergötland, Halleberg, något norr om Hallsjön	12.4628	58.3826	1943	G. Svensson	B13146	0	0	1	0
C	Västergötland, Halleberg, Skytteklev	12.4875	58.3838	1932	R. Santesson	B13411	1	0	0	0
C	Västergötland, Kinnekulle	13.3756	58.5748	1918	C. Stenholm	B13104	0	0	1	0
C	Västergötland, Kinnekulle, Råbäck	13.3748	58.6118	1918	C. Stenholm	B13142	0	0	1	0
C	Västergötland, Medelplana, old limestone quarry N of Rustsäter, middle part	13.3945	58.6126	2018	Lars Hedenäs	B279696	1	0	0	0
C	Västergötland, Medelplana, open area 850 W of Hönsäter	13.4111	58.6263	2018	Lars Hedenäs	B279700	0	0	1	0
C	Västergötland, Otterstad, Läckö	13.2167	58.6726	1923	G. Kjellberg	B13143	1	0	0	0
C	Västergötland, Skövde	13.8305	58.4027	1914	A. Hülphers	B13409	0	0	1	0
C	Västergötland, Skövde, Billingen, Våmb	13.8045	58.3824	1912	A. Hülphers	B13135	0	0	1	0
C	Västergötland, Skövde, bortom Våmbs kyrka	13.8045	58.3824	1912	A. Hülphers	B13131	1	0	0	0
C	Västergötland, Varnhem	13.6553	58.3848	1931	A. Hülphers	B13412	1	0	0	0
C	Västergötland, Våmb, gamla kalkbrottet	13.815	58.3886	1912	A. Hülphers	B13136	0	0	1	0
C	Västergötland, Österplana, Österplana hed	13.4291	58.5727	1908	H. Witte	B13156	1	0	0	0
C	Västmanland, Arboga	15.8415	59.394	1890	C. A. Tärnlund	B14393	0	0	1	0
C	Västmanland, Arboga	15.8415	59.394	1880	E. Ährling	B13968	0	0	1	0
C	Västmanland, Arboga, Jäder, i skogen vid Källängen	15.7871	59.4101	1944	C. A. Tärnlund	B13969	0	0	1	0
C	Västmanland, Arboga, kullar N om staden	15.8345	59.4072	1940	C. A. Tärnlund	B13971	0	0	1	0
C	Västmanland, Arboga, Lilla Djäkneberget	15.8198	59.3921	1944	C. A. Tärnlund	B13967	0	1	0	0
C	Västmanland, Arboga, Lilla Djäkneberget	15.8198	59.3921	1938	C. A. Tärnlund	B14525	1	0	0	0
C	Västmanland, Arboga, Zackrisberg	15.8924	59.3949	1918	C. A. Tärnlund	B13884	0	0	1	0
C	Västmanland, Badelunda, Badelundaåsen 700 m SSE of Tibble	16.6381	59.6157	2014	Lars Hedenäs	B202629	1	0	0	0
C	Västmanland, Badelunda, Björnön	16.608	59.5766	1889	C. H. Johansson	B13885	0	0	1	0
C	Västmanland, Fellingsbro, Finnåkers bruk	15.5788	59.5642	1939	C. A. Tärnlund	B14526	0	0	1	0
C	Västmanland, Linde	15.2326	59.5945	1920	H. Möller	B13879	0	0	1	0
C	Västmanland, Linde, Gusselby	15.2173	59.6442	1920	H. Möller	B14392	0	1	0	0
C	Västmanland, Linde, Lindesberg, Guldsmedshyttan	15.1052	59.7023	1920	H. Möller	B13868	1	0	0	0
C	Västmanland, Linde, Siggebohyttan	15.0337	59.6164	1920	H. Möller	B14397	0	0	1	0
C	Västmanland, Linde, Östra Öskevik, Korsbacken, 120 m a.s.l.	15.0201	59.6076	2015	Lars Hedenäs	B226630	0	0	1	0
C	Västmanland, Ljusnarsberg, Kopparberg, Bånghammar	15.0186	59.8645	1912	H. Möller	B14396	1	0	0	0
C	Västmanland, Nora, Bergsmanshyttan, Kalkudden, 110 m a.s.l.	15.0103	59.575	2015	Lars Hedenäs	B226639	1	0	0	0
C	Västmanland, Nora, Gamla Pershyttan, Kettilgruvan, 170 m a.s.l.	14.9993	59.4918	2015	Lars Hedenäs	B226674	1	0	0	0
C	Västmanland, Norberg	15.9389	60.0773	1964	K. Wigh 80	B280093	1	0	0	0
C	Västmanland, Norberg, Klackberget	15.8893	60.0757	1920	C. A. Tärnlund	B13965	0	0	1	0
C	Västmanland, Norberg, Kärrgruvan	15.9415	60.0962	1927	C. A. Tärnlund	B13872	0	0	1	0
C	Västmanland, Norberg, Malmkärragruvan	15.8454	60.0594	2020	Lars Hedenäs	B299484	1	0	0	0
C	Västmanland, Odensvi	15.9857	59.5841	1833	O. Wernberg	B13881	0	1	1	1
C	Västmanland, På en holme i ån vid Wästerqvarn i Kohlbäcks sn	16.253	59.5456	1834		B13877	0	1	1	1
C	Västmanland, Ramnäs, Virsbo bruk	16.0498	59.8673	1927	C. A. Tärnlund	B13875	1	0	0	0
C	Västmanland, Ramsberg, Stråssa, Kårberg	15.1939	59.7396	1937	C. A. Tärnlund	B14394	0	0	1	0
C	Västmanland, Romfartuna, Munge	16.5133	59.7446	1842	O. L. Sillén	B13883	0	1	1	1
C	Västmanland, Sala	16.5759	59.904	1887	Erik Nyman	B13866	0	0	1	0
C	Västmanland, Sala grufva	16.5759	59.904	1839	O. L. Sillén	B13880	0	1	1	1
C	Västmanland, Sala grufva	16.5759	59.904	1837	Sillén	B13874	0	1	1	1
C	Västmanland, Sala grufva	16.5759	59.904		K. F. Thedenius	B13878	0	1	1	1
C	Västmanland, Sala, 2.4 km SW of Sala church, Sala mines, Gruvbyn, S of gravel road (RUBIN 11G 8i 3029)	16.5738	59.9042	2002	L. Hedenäs	B70156	0	1	0	0
C	Västmanland, Sala, 2.4 km SW of Sala church, Sala mines, Gruvbyn, S of gravel road (RUBIN 11G 8i 3029)	16.5738	59.9042	2001	Lars Hedenäs	B124247	0	1	0	0
C	Västmanland, Sala, 2050 m SV om Sala kyrka, Sala gruva, vid parkeringen nära Drottning Christinas schakt. RUBIN 11G 8i 3331.	16.5755	59.9069	2001	Cecilia Hammarberg	B65961	1	0	0	0
C	Västmanland, Sala, gruvfältet	16.5759	59.904	1938	C. A. Tärnlund	B13870	0	1	0	0
C	Västmanland, Sala, gruvfältet	16.5759	59.904	1938	C. A. Tärnlund	B13972	0	0	1	0
C	Västmanland, Sala, Jacob Matts kvarn	16.5693	59.9297	1938	C. A. Tärnlund	B13867	0	0	1	0
C	Västmanland, Sala, N of Sala, between Norrängen and Odinslund	16.5954	59.9376	2011	Lars Hedenäs, Göran Odelvik, Elin Ohlsson	B185170	1	0	0	0
C	Västmanland, Sala, near NE portion of Centralschaktet	16.6024	59.9359	2021	Lars Hedenäs	B305313	0	0	1	0
C	Västmanland, Sala, Norrängen, just E of N portion Centralschaktet	16.6023	59.9359	2011	Lars Hedenäs	B185527	0	1	1	1
C	Västmanland, Sala, Nyberg	16.481	59.9115	1938	C. A. Tärnlund	B14524	0	0	1	0
C	Västmanland, Sala, the silver mine area, E end of Stenhavet	16.5717	59.9054	2011	Lars Hedenäs	B184555	0	0	1	0
C	Västmanland, Sala, the silver mine area, N of Sala gruva	16.577	59.9094	2012	Lars Hedenäs	B194148	1	0	0	0
C	Västmanland, Sala, vid gruvan	16.5759	59.904	1922	C. A. Tärnlund	B13873	1	0	0	0
C	Västmanland, Sala, vid kalkbrotten	16.5971	59.935	1922	C. A. Tärnlund	B13962	0	0	1	0
C	Västmanland, Skinnskatteberg, Bruket	15.6804	59.8264	1935	C. A. Tärnlund	B14395	0	0	1	0
C	Västmanland, Skinnskatteberg, i skogen mellan Kärrgeten och stora landsvägen	15.6587	59.8413	1935	C. A. Tärnlund	B14390	0	0	1	0
C	Västmanland, Skinnskatteberg, Kyrkbyn	15.6841	59.8286	1936	C. A. Tärnlund	B13970	0	0	1	0
C	Västmanland, Skinnskatteberg, nära kyrkan	15.6836	59.83	1935	C. A. Tärnlund	B14391	1	0	0	0
C	Västmanland, Säterbo, Gravudden vid Gamla kanalen	15.9414	59.3743	1933	C. A. Tärnlund	B13966	0	0	1	0
C	Västmanland, Säterbo, Åsby	15.9189	59.3802	1921	C. A. Tärnlund	B13963	0	0	1	0
C	Västmanland, Vikers, Knapptorp	14.9374	59.4849	1967	N. Hakelier	B13882	0	0	1	0
C	Västmanland, Vikers, Älvhyttan	14.8179	59.4413	1924	C. A. Tärnlund	B13876	1	0	0	0
C	Västmanland, Västanfors	15.8069	59.9876	1927	C. A. Tärnlund	B13961	0	0	1	0
C	Västmanland, Västervåla, Ängelsberg	16.0099	59.9569	1891	C. H. Johansson	B13869	0	0	1	0
C	Västmanland, Västervåla, Ängelsberg, nära herrgården	16.0089	59.9683	1928	C. A. Tärnlund	B13964	0	0	1	0
C	Västmanland, Västervåla, Ängelsberg, nära herrgården	16.0089	59.9683	1927	C. A. Tärnlund	B13871	0	0	1	0
C	Västmanland, Västerås, Lundby	16.4656	59.5769	1929	C. A. Tärnlund	B14527	1	0	0	0
C	Ångermanland, Hemsö, Nordanö, Havsto	18.1471	62.7497	2013	Lars Hedenäs, Göran Odelvik, Kristina Rönblom	B200801	1	0	0	0
C	Ångermanland, Härnön	17.9973	62.6182	1881	F. Lönnkvist	B17093	0	0	1	0
C	Ångermanland, Högsjö kyrkomur	17.8963	62.7924	1916	Alfred Arvén	B17089	0	0	1	0
C	Ångermanland, Högsjö, Högsjö old church	17.8385	62.7993	2001	L. Hedenäs	B69213	1	0	0	0
C	Ångermanland, Sollefteå, Niporna	17.2711	63.1692	1921	H. Möller	B17088	1	0	0	0
C	Ångermanland, Sånga skn, Paraberget	17.4977	63.1787	1926	Sten Grapengiesser	B17090	0	1	1	1
C	Ångermanland, Säbrå, Grofell	17.7468	62.6382	1870	H. Holmgren	B17086	0	0	1	0
C	Ångermanland, Vibyggerå, NE side of Skuleberget	18.3516	63.0794	1952	Gillis Een	B78602	0	1	0	0
C	Östergötland, Ekhult	16.0098	58.3543	1877	M. Huss	B13392	0	1	1	1
C	Östergötland, Ekhult i Björsäter	16.0098	58.3543	1867	M. Huss	B13386	0	1	1	1
C	Östergötland, Flistad	15.4129	58.4754	1907	A. Hassler	B13397	1	0	0	0
C	Östergötland, Furingstad	16.3433	58.5556	1912	P. A. Issén	B13398	0	0	1	0
C	Östergötland, Gistad	15.9225	58.4552	1885	Kindberg	B13385	1	0	0	0
C	Östergötland, Härberga, vid kyrkan	15.1981	58.3845	1929	C. A. Tärnlund	B13395	0	0	1	0
C	Östergötland, Krokek, around old limestone quarry 500 m WSW of Gusätter	16.4058	58.6691	2015	Lars Hedenäs	B225256	0	0	1	0
C	Östergötland, Krokek, around old limestone quarry 500 m WSW of Gusätter	16.4039	58.6713	2015	Lars Hedenäs	B225272	0	1	0	0
C	Östergötland, Krokek, Marmorbruket	16.4258	58.661	1906	H. Möller	B13396	0	0	1	0
C	Östergötland, Krokek, Marmorbruket	16.4258	58.661	1877	Kindberg	B13390	0	0	1	0
C	Östergötland, Krokek, old limestone quarries 750 m ESE of Oxåker	16.4361	58.6715	2015	Lars Hedenäs	B223701	0	0	1	0
C	Östergötland, Krokek, Timmergata	16.4969	58.6591	1912	P. A. Issén	B13394	1	0	0	0
C	Östergötland, Landeryd, Uvberget	15.7329	58.3569	1887	Erik Nyman	B13400	0	0	1	0
C	Östergötland, Lillkyrka, Fröö	15.8831	58.5026			B13391	1	0	0	0
C	Östergötland, Linköping	15.6194	58.4053	1866	E. Vetterhall	B13384	0	0	1	0
C	Östergötland, Linköping	15.6194	58.4053	1865	E. V. Vetterhall	B13382	0	0	1	0
C	Östergötland, Linköping, Djurgården	15.6047	58.392	1885	herb. Nordenström	B13389	0	0	1	0
C	Östergötland, Risinge	15.8474	58.7027	1896	F. O. Westerberg	B13387	0	0	1	0
C	Östergötland, Risinge	15.8474	58.7027	1896	F. O. Westerberg	B13399	0	0	1	0
C	Östergötland, Risinge, Kyrkogården	15.8474	58.7027	1901	F. O. Westerberg	B13401	0	0	1	0
C	Östergötland, Skedevi, Rejmyra	15.9304	58.8285	1863	H. von Post	B13388	0	0	1	0
C	Östergötland, Stjärnorp, i Stjärnorpsravinen	15.5749	58.5331	1971	Gunnar Holmbring	B280091	0	0	1	0
C	Östergötland, Tåby, Torp	16.375	58.5036	1912	P. A. Issén	B13402	0	0	1	0
C	Östergötland, Vreta Kloster	15.5192	58.4821	1925	H. Möller	B13393	1	0	0	0
S	Blekinge, Asarum, Tostarp	14.8314	56.2282	1917	S. Medelius	B12396	1	0	0	0
S	Blekinge, Jämshög, Gillarum	14.5778	56.2351	1919	S. Medelius	B12397	1	0	0	0
S	Blekinge, Jämshög, Hässlehult	14.5632	56.2456	1921	S. Medelius	B12394	0	0	1	0
S	Blekinge, Karlshamn, Pängaberget, parcissime	14.8778	56.1749	1918	S. Medelius	B12395	1	0	0	0
S	Blekinge, Karlskrona, Karlskrona skärg., Getskär	15.6007	56.1472	1875	J. F. E. Svanlund	B12392	0	0	1	0
S	Blekinge, Kristianopel	16.0424	56.2562	1918	H. Möller	B12393	1	0	0	0
S	Blekinge, Mjällby, Hörvik	14.7621	56.0387	1919	S. Medelius	B12398	1	0	0	0
S	Blekinge, Rödeby	15.6222	56.2624	1888	J. F. E. Svanlund	B12391	1	0	0	0
S	Bohuslän, Björlanda, i bergsskreva nära Torslandagränsen, c. 3,4 km V om Lilleby vägskilje	11.7407	57.7398	1922	H. E. Johansson	B12983	1	0	0	0
S	Bohuslän, Björlanda, i dalskrevan 750 m Ö om Sörröd	11.8644	57.7193	1922	H. E. Johansson	B12982	1	0	0	0
S	Bohuslän, Björlanda, i lövängsmark på diabasgrund c. 500 m NNV om Nohlviks	11.8254	57.7831	1922	H. E. Johansson	B12984	1	0	0	0
S	Bohuslän, Björlanda, Sillvik, skalgrusbank, RN: 1258220 / 6408410	11.7451	57.7351	1977	Tomas Hallingbäck 44198	B201846	1	0	0	0
S	Bohuslän, GBG, Hisingen, Sillviks skalgrusbank	11.7442	57.7355	2015	Andreas Stansvik AS40	B263578	1	0	0	0
S	Bohuslän, Hjärtum, Ström	12.1035	58.1417	1892	S. E. Almqvist	B12988	0	0	1	0
S	Bohuslän, Kungälv, Bohus fästning	11.9995	57.8622	1924	H. E. Johansson	B12986	1	0	0	0
S	Bohuslän, Orust, Röra, Henån, några 100 m från havsstranden	11.6836	58.238	1930	C. Stenholm	B12987	0	0	1	0
S	Bohuslän, Stenkyrka, berget SV om Kuballa, halvvägs mot toppen	11.612	57.9615	1945	O. H. Selling	B12994	1	0	0	0
S	Bohuslän, Torsby, Hålsungamyren, skalgrusbanken, RN: 1259112 / 6420371	11.7481	57.8427	1976	Tomas Hallingbäck 46096	B201848	1	0	0	0
S	Bohuslän, Torsby, uppe på höjden 900 m N om St. Röd, 1 km SV från Torsby kyrka	11.771	57.8346	1924	H. E. Johansson	B12985	0	0	1	0
S	Bohuslän, Valla, Furusäter	11.6732	58.0403	1954	S. Nilsson	B12981	1	0	0	0
S	Gotland, Alskog	18.6199	57.3366	1907	H. Hesselman	B12691	0	0	1	0
S	Gotland, Bro, Dacker	18.4645	57.6623	1935	P. A. Larsson	B12688	1	0	0	0
S	Gotland, Buttle, E of Altajme	18.5443	57.3903	2016	Lars Hedenäs	B236354	0	0	1	0
S	Gotland, Buttle, SE of Altajme	18.5552	57.3852	2016	Lars Hedenäs	B236355	1	0	0	0
S	Gotland, Endre, Ölbäck (N of Storvidemyr)	18.3734	57.6205	1989	L. Hedenäs G89-83	B12697	1	0	0	0
S	Gotland, Etelhem, N of Levide	18.488	57.3509	2019	Lars Hedenäs	B290200	0	0	1	0
S	Gotland, Fleringe, 0.6-0.9 km W of Hau	18.9722	57.8879	2016	Lars Hedenäs	B236369	0	0	1	0
S	Gotland, Fleringe, Gajsthajd	18.8611	57.907	2014	Lars Hedenäs, Irene Bisang, Sanna Huttunen, Göran Odelvik	B205013	0	0	1	0
S	Gotland, Fleringe, S of Kyrkgatmyr	18.9637	57.8886	2016	Lars Hedenäs	B236364	0	0	1	0
S	Gotland, Furilen	19.0112	57.7744	1970	S. Sunhede	B280097	1	0	0	0
S	Gotland, Fårö, Broa	19.0828	57.8695	2000	L. Hedenäs	B31898	0	1	0	0
S	Gotland, Fårö, Broa, just W of the windmill	19.0828	57.8695	2003	L. Hedenäs	B84933	0	1	0	0
S	Gotland, Gammelgarn, Klintklinten	18.8263	57.4022	2016	Lars Hedenäs	B236362	0	0	1	0
S	Gotland, Gammelgarn, N of Skogby	18.806	57.3973	2019	Lars Hedenäs	B290271	0	0	1	0
S	Gotland, Gothem, sandfält vid Gothemsåns utlopp	18.7638	57.615	1931	A. Hülphers	B12689	0	0	1	0
S	Gotland, Hall, Ö. Norrby	18.7489	57.9081	1970	S. Sunhede	B280095	1	0	0	0
S	Gotland, Hangvar sn, Ireviken, tallskog på sand	18.5877	57.8389	1977	Thomas Karlsson	B74354	1	0	0	0
S	Gotland, Hejde, Gervalls	18.3437	57.4123	1892	F. E. Ahlfvengren	B12684	1	0	0	0
S	Gotland, Hejnum, NE of Bjärs	18.6319	57.702	2017	Lars Hedenäs	B251457	0	0	1	0
S	Gotland, Hellvi, ca. 200 m N of Lörge	18.9461	57.7434	2013	Lars Hedenäs	B196918	0	0	1	0
S	Gotland, Linde, Lindeberget	18.378	57.2799	2014	Lars Hedenäs, Sanna Huttunen, Göran Odelvik	B204966	0	0	1	0
S	Gotland, Othem, Filehajdar, Othemars	18.7124	57.7465	2019	Lars Hedenäs	B290268	1	0	0	0
S	Gotland, Othem, Othem	18.739	57.7476	1895	M. Östman	B12682	0	0	1	0
S	Gotland, Slite	18.801	57.701	1970	S. Sunhede	B280096	1	0	0	0
S	Gotland, Stora Karlsö	17.9803	57.2904	1865	S. O. Lindberg	B12692	0	0	1	0
S	Gotland, Sundre, the area N of Lillmyr	18.1909	56.9315	2014	Lars Hedenäs, Irene Bisang, Sanna Huttunen, Göran Odelvik	B204325	1	0	0	0
S	Gotland, Tofta, Gnisvärd	18.1136	57.5034	1954	Å. Hovgard	B12687	0	1	0	0
S	Gotland, Visby	18.2951	57.6393	1888	O. W. Vennersten	B12681	0	0	1	0
S	Gotland, Visby	18.2951	57.6393	1887	K. Johansson	B12690	0	0	1	0
S	Gotland, Visby	18.2951	57.6393	1881	F. Lönnkvist	B12683	0	0	1	0
S	Gotland, Visby	18.2951	57.6393	1873	J. E. Zetterstedt 344	B12694	0	0	1	0
S	Gotland, Visby, Kopparsvik	18.2748	57.6281	1865	S. O. Lindberg	B12695	1	0	0	0
S	Gotland, Visby, norrut	18.3094	57.6547	1889	L. P. R. Matsson	B12686	0	0	1	0
S	Gotland, Visby, Palissaderna	18.2846	57.6347	1892	T. Vestergren	B12696	0	0	1	0
S	Gotland, Visby, på berggrund utanför Norderport	18.3011	57.645	1929	P. A. Larsson	B12693	0	0	1	0
S	Gotland, Visby, Snäckgärdet	18.3294	57.668	1926	H. Möller	B12699	1	0	0	0
S	Gotland, Västerhejde, Högklint vid Visby	18.2001	57.5987	1905	H. Witte	B12698	0	0	1	0
S	Halland, Frillesås, Kyrketorp	12.237	57.3308	1922	C. Stenholm	B12996	1	0	0	0
S	Halland, Torup, vägkant vid vägen till Kinnared, ytterst sparsamt	13.0734	56.9665	1920	S. Medelius	B12995	1	0	0	0
S	Sireköpinge, vid järnvägen mellan Sireköpinge och Tågarp	12.9658	55.9239	1925	S. Medelius	B12160	1	0	0	0
S	Skåne, Barsebäck (nematode galls)	12.9524	55.7753	1892	H. Möller	B12369	1	0	0	0
S	Skåne, Brösarp	14.1179	55.7232	1913	H. Möller	B12153	1	0	0	0
S	Skåne, Fjelkestad, Råbelöv	14.1881	56.0803	1924	A. Uggla	B12159	0	0	1	0
S	Skåne, Gärdslöv, Näsbyholm	13.4618	55.4682	1897	N. H. Nilsson	B12157	1	0	0	0
S	Skåne, Hanaskog	14.0858	56.1619	1931	Elsa Tufvesson	B116790	1	0	0	0
S	Skåne, Hyllie, strandängar	12.9045	55.5593	1870	J. Eriksson (S)	B12373	1	0	0	0
S	Skåne, Ivö	14.4069	56.1076	1881	A. Grönvall	B12372	0	0	1	0
S	Skåne, Ivö, ”Klacken”	14.4067	56.1336	1933	Elsa Tufvesson	B116791	0	0	1	0
S	Skåne, Ivö, vid Ivö klack	14.4025	56.1386	1983	L. Hedenäs	B13980	1	0	0	0
S	Skåne, Kviinge, Hanaskog	14.1033	56.1592	1913	O. J. Hasslow (S)	B12371	0	0	1	0
S	Skåne, Kviinge, Hanaskog (young, unopened archegonia)	14.1033	56.1592	1914	O. J. Hasslow	B12163	0	0	1	0
S	Skåne, Lackalänga	13.1116	55.7754	1905	H. Möller	B12364	0	0	1	0
S	Skåne, N. Mellby, Adseke, öster p. 96	13.7383	56.0373	1944	S. Waldheim	B12164	1	0	0	0
S	Skåne, N. Åkarp, Bjärnum skog	13.7236	56.2906	1942	S. Waldheim	B12165	0	0	1	0
S	Skåne, Norrviddinge	13.0979	55.8381	1906	H. Möller	B12162	1	0	0	0
S	Skåne, Oppmanna, Söndraby	14.3088	56.1324	1943	S. Waldheim	B12161	1	0	0	0
S	Skåne, Simris	14.3231	55.5363	1913	H. Möller	B12154	1	0	0	0
S	Skåne, Sireköpinge	12.9923	55.9286	1934	H. Witte	B12158	1	0	0	0
S	Skåne, Sjöbo	13.6986	55.6306	1901	A. Heintze (S)	B12366	1	0	0	0
S	Skåne, St. Ibb, Kyrkbacken vid stranden	12.6715	55.9119	1904	H. Möller	B12370	1	0	0	0
S	Skåne, V Vram, sandtagen 300 m Ö kyrkan	13.9751	55.9266	1976	Thomas Karlsson	B74275	1	0	0	0
S	Skåne, V. Alstad, Marieberg	13.2281	55.4745	1825	Åkerman	B12155	0	0	1	0
S	Skåne, Vinslöv, ad Lommarp	13.8697	56.0982	1899	N. Alsthin (S)	B12368	0	0	1	0
S	Skåne, Vitaby, Klammerbäcken	14.2003	55.7111	1913	H. Möller	B12365	0	0	1	0
S	Skåne, Vittskövle	14.1466	55.8551	1913	H. Möller	B12156	0	0	1	0
S	Skåne, Ö. Broby, vid Grenanders	14.0797	56.2547	1862	C. O. Hamnström	B12367	1	0	0	0
S	Småland, Agunnaryd sn, Ramsås backar.	14.2183	56.7081	1961	Judith & Ingvar Christoffersson	B86697	1	0	0	0
S	Småland, Algutsboda	15.5825	56.7226	1862	N. J. Scheutz	B12962	1	0	0	0
S	Småland, Algutsboda, Sjökvarn (= Getsjökvarn)	15.5487	56.6675	1942	R. Florin (S)	B12886	1	0	0	0
S	Småland, Algutsboda, Tomeshult	15.4404	56.7326	1942	R. Florin (S)	B12885	1	0	0	0
S	Småland, Alsheda	15.2514	57.4211		N. J. Scheutz	B12961	0	0	1	0
S	Småland, Eksjö	14.9704	57.667	1906	F. Johanson (S)	B12880	0	0	1	0
S	Småland, Eksjö, Eksjöholm	14.9973	57.6792	1876	E. Vetterhall	B12701	0	0	1	0
S	Småland, Eksjö, Sjöängen	14.9784	57.6715	1927	E. von Krusenstjerna	B14930	0	0	1	0
S	Småland, Gladhammar, Kilman	16.4533	57.7093	1915	H. Möller	B12866	0	0	1	0
S	Småland, Gränna	14.4681	58.0198	1912	Alfred Arvén	B12704	0	0	1	0
S	Småland, Gränna	14.4681	58.0198	1912	Alfred Arvén	B12967	0	0	1	0
S	Småland, Gränna, Galgbacken	14.4491	57.9988	1910	Alfred Arvén	B12969	1	0	0	0
S	Småland, Gränna, Skarpabacken	14.4436	58.0017	1912	Alfred Arvén	B12709	0	0	1	0
S	Småland, Gränna, Vretaholm	14.4754	58.0419	1912	Alfred Arvén	B13000	0	0	1	0
S	Småland, Gärdserum, Kvistrum	16.1469	58.1652	1879	M. Huss (S)	B12889	0	0	1	0
S	Småland, Hossmo	16.2253	56.6373	1955	E. von Krusenstjerna	B12888	0	0	1	0
S	Småland, Hossmo	16.2253	56.6373	1908	H. Möller	B12874	0	0	1	0
S	Småland, Hult, Hällehult	15.125	57.6319	1929	J. Gustavsson	B12705	0	0	1	0
S	Småland, Huskvarna	14.2714	57.7882	1867	A. Magnusson	B12867	0	0	1	0
S	Småland, Hvena, Hultsfred	15.8487	57.4963	1907	H. Möller	B12968	1	0	0	0
S	Småland, Hälleberga, Orrefors	15.743	56.8394	1907	H. Möller	B12959	1	0	0	0
S	Småland, Ingatorp	15.4078	57.638	1905	C. L. Löfvander	B12708	0	0	1	0
S	Småland, Ingatorp	15.4078	57.638	1888	P. Dusén	B12966	0	0	1	0
S	Småland, Jönköping, supra Torpa	14.1397	57.7688	1901	T. G. Halle	B12702	0	0	1	0
S	Småland, Kalmar, norrut	16.3144	56.7063	1907	H. Möller (S)	B12872	1	0	0	0
S	Småland, Kalmar, Svinö	16.3781	56.6816	1917	H. Möller	B12963	1	0	0	0
S	Småland, Ljungby, Fredriksström	16.1136	56.715	1906	H. Möller	B12882	1	0	0	0
S	Småland, Lofta, Öfverum	16.3217	57.9866	1914	H. Möller	B13001	0	0	1	0
S	Småland, Loftahammar, Gränsö	16.6865	57.7629	1914	H. Möller	B12865	0	1	0	0
S	Småland, Madesjö	15.8797	56.7413	1914	S. Medelius (S)	B12876	1	0	0	0
S	Småland, Madesjö	15.8797	56.7413	1910	S. Medelius	B12703	1	0	0	0
S	Småland, Madesjö	15.8797	56.7413	1908	S. Medelius (S)	B12887	1	0	0	0
S	Småland, Madesjö, Pukeberg	15.9158	56.7296	1915	H. Möller	B12873	0	0	1	0
S	Småland, Malmbäck	14.4631	57.5808	1927	R. Florin (S)	B12883	1	0	0	0
S	Småland, Misterhult, Jungfrun	16.7926	57.2519	1914	H. Möller	B13003	0	0	1	0
S	Småland, Månsarp sn; Taberg, vid gruvans fot. RN: 6396031,1397265	14.0825	57.6777	2013	Tommy Nilsson, Jimmie Rundberg 1483	B209451	1	0	0	0
S	Småland, Månsarp, Taberg	14.0807	57.6828	1905	C. L. Löfvander (S)	B12878	0	0	1	0
S	Småland, N. Solberga, Hamnaryd	14.8502	57.6854		N. J. Scheutz	B12707	0	0	1	0
S	Småland, Rogberga, Tenhult, Torps skog	14.3413	57.7168	1891	Alfred Arvén	B12965	0	0	1	0
S	Småland, Ryssby, Skägganäs	16.4643	56.788	1907	H. Möller	B12960	1	0	0	0
S	Småland, Svennarum, Hook	14.2779	57.5083	1927	R. Florin (S)	B12870	0	0	1	0
S	Småland, Säby, Kongsbacken	15.02	58.0679	1933	G. von Rosen	B12997	1	0	0	0
S	Småland, Säby, Romanäs, Kongsbacken	15.02	58.0679	1933	S. Waldheim (S)	B12869	1	0	0	0
S	Småland, Södra Vi, Ålhult	15.7489	57.8115	1886	P. Dusén	B12884	1	0	0	0
S	Småland, Tingsås, Tingsryd, Tiken	14.9636	56.5282	1926	T. G. Halle	B12706	1	0	0	0
S	Småland, Tranås	14.9694	58.0347	1916	R. V. Bahr	B13004	0	1	0	0
S	Småland, Tranås	14.9694	58.0347	1912	J. Persson (S)	B12881	1	0	0	0
S	Småland, Tutaryd	14.0479	56.8436	1956	J. Christoffersson (S)	B12877	0	0	1	0
S	Småland, Tutaryd, stenmur vid kyrkan	14.0479	56.8436	1948	J. Christoffersson	B12999	0	0	1	0
S	Småland, Tutaryd.	14.0485	56.8487	1953	Judith Christoffersson	B86700	1	0	0	0
S	Småland, Tutaryd.	14.0485	56.8487	1952	Judith Christoffersson	B86702	0	0	1	0
S	Småland, Törnesfalla, Hjorteberg	16.5169	57.799	1914	H. Möller	B12879	0	0	1	0
S	Småland, Visingsö	14.3305	58.039	1877	J. E. Zetterstedt 344	B12700	0	0	1	0
S	Småland, Västervik, Marielund	16.6713	57.7349	1914	H. Möller	B12868	0	1	0	0
S	Småland, Ökna	15.4288	57.435	1904	C. L. Löfvander	B12958	0	0	1	0
S	Svenska mossor. Skåne, Ivö s:n, Ivön	14.4067	56.1336	1960	Judith Christoffersson	B208166	0	0	1	0
S	Västergötland, Falköping, Mösseberg	13.5216	58.1834	1946	Per Olof Nyman	B13144	0	0	1	0
S	Västergötland, Fröjered	14.0182	58.2464	1884	J. R. Jungner	B13147	0	0	1	0
S	Västergötland, Gudhem	13.5556	58.2389	1912	A. Hülphers	B13137	1	0	0	0
S	Västergötland, Gustaf Adolf, Baskarp	14.1359	58.0098	1923	T. G. Halle	B13157	0	0	1	0
S	Västergötland, Gökhem	13.4082	58.1737	1942	A. Hülphers	B13413	0	0	1	0
S	Västergötland, Gökhem	13.4082	58.1737	1922	A. Hülphers	B13132	1	0	0	0
S	Västergötland, Gökhem	13.4082	58.1737	1913	A. Hülphers	B13408	1	0	0	0
S	Västergötland, Göteborg, ad Castellum Kronan	11.9548	57.6961	1869	herb. Areschoug	B13149	0	0	1	0
S	Västergötland, Högstena, Högstena kalkhed	13.7244	58.2405	1932	A. Hülphers	B13134	0	1	1	0
S	Västergötland, Högstena, Högstena kalkhed	13.7244	58.2405	1927	A. Hülphers	B13407	0	0	1	0
S	Västergötland, Hössne, nära landsvägsbron över Ätran	13.5449	57.8069	1927	T. G. Halle	B13152	0	0	1	0
S	Västergötland, Karleby	13.6381	58.1503	1944	A. Hülphers	B13406	0	0	1	0
S	Västergötland, Karleby, Djupedalen	13.6393	58.172	1936	A. Hülphers	B13138	1	0	0	0
S	Västergötland, Kleva, Mösseberg, på kalklagret vid Kleva	13.472	58.208	1869	J. E. Zetterstedt	B13148	0	0	1	0
S	Västergötland, Kylingared, Valshalla	13.7562	57.8807	1927	T. G. Halle	B13155	1	0	0	0
S	Västergötland, Kyrketorp, Skultorp, kalklagret	13.8173	58.3471	1915	A. Hülphers	B13133	0	0	1	0
S	Västergötland, Långared, kyrkan	12.5196	58.0446	1944	T. E. Hasselroth	B13141	1	0	0	0
S	Västergötland, N. Kyrketorp, Skultorp	13.8174	58.3464	1916	A. Hülphers	B13103	0	0	1	0
S	Västergötland, Sjötofta, Ekefors	13.2678	57.3168	1923	C. Stenholm	B13140	1	0	0	0
S	Västergötland, Tuve, i skalgrustaget strax NV om Grimbo	11.9315	57.7429	1922	H. E. Johansson	B13154	1	0	0	0
S	Västergötland, Tuve, i stora skalgrustaget N om Skändla	11.9328	57.781	1924	H. E. Johansson	B13150	1	0	0	0
S	Västergötland, Varola, Vreten	13.9277	58.2755	1863	S. E. Henschen	B13106	0	0	1	0
S	Västergötland, Vartofta-Åsaka	13.664	58.064	1946	A. Hülphers	B13145	0	0	1	0
S	Västergötland, Vassända-Naglum, pr. Arvidstorp	12.2614	58.2779	1914	G. Hellsing	B13109	1	0	0	0
S	Västergötland, Vilske Kleva, "klinterna"	13.4474	58.2092	1913	E. P. Vrang	B13153	0	0	1	0
S	Västergötland, Vilske Kleva, kalkbrott nära skolan	13.4391	58.2085	1932	A. Hülphers	B13102	0	0	1	0
S	Västergötland, Vilske Kleva, Kleva hed	13.4474	58.2092	1932	A. Hülphers	B13130	0	0	1	0
S	Västergötland, Vilske-Kleva, Kleva hed	13.4474	58.2092	1933	A. Hülphers	B13410	0	0	1	0
S	Västergötland, Vilske-Kleva, Klevahed	13.4474	58.2092	1945	A. Hülphers	B13405	0	0	1	0
S	Västergötland, Vårkumla, Grännarp	13.6135	58.0785	1937	T. G. Halle	B13404	1	0	0	0
S	Öland, Alböke, Alvaret W of Alböke	16.7662	56.9504	2016	Lars Hedenäs	B236470	1	0	0	0
S	Öland, Alböke, Alvaret W of Alböke	16.7608	56.9529	2016	Lars Hedenäs	B236471	1	0	0	0
S	Öland, Algutsrum, Algutsrums alvar	16.5257	56.6732	1916	H. Möller	B12672	0	0	1	0
S	Öland, Algutsrum, Gråborg	16.6051	56.6661	1916	H. Möller	B12678	1	0	0	0
S	Öland, Borgholm	16.6581	56.8758	1893	H. A. Tullgren	B12673	0	0	1	0
S	Öland, Borgholm, Borgholms alvar	16.6487	56.8659	1908	H. Möller	B12468	1	0	0	0
S	Öland, Borgholm, Borgholms alvar	16.6487	56.8659	1905	H. Witte	B12472	0	0	1	0
S	Öland, Borgholm, Borgholms slottsbranter	16.6432	56.8716	1908	H. Möller	B12676	0	0	1	0
S	Öland, Borgholm, Ekskogen	16.6452	56.875	1932	H. Witte	B12493	0	0	1	0
S	Öland, Böda, Melböda skog	17.0685	57.2396	1865	S. O. Lindberg	B12680	0	0	1	0
S	Öland, Böda, Skäftekärr	17.0039	57.2459	1917	H. Möller	B12475	0	0	1	0
S	Öland, Gårdby	16.6364	56.6004	1917	H. Möller	B12675	0	0	1	0
S	Öland, Gärdslösa	16.7422	56.7958	1970	S. Sunhede	B280098	1	0	0	0
S	Öland, Hulterstad, Skärlöv, alvaret	16.5442	56.4175	1917	R. Sterner	B12470	1	0	0	0
S	Öland, Högby, Sandby, N of Kesnäsudden	17.0735	57.1803	2016	Lars Hedenäs	B236501	1	0	0	0
S	Öland, Högby, Viksjö	16.9727	57.1756	1917	H. Möller	B12478	1	0	0	0
S	Öland, Högsrum, St. Rör	16.5344	56.7562	1916	H. Möller	B12473	1	0	0	0
S	Öland, Kaslösa, Bredinge alvar	16.4409	56.4881	1912	S. Medelius	B12486	0	0	1	0
S	Öland, Kastlösa, Kastlösa alvar	16.4507	56.4536	1929	C. Stenholm	B12477	1	0	0	0
S	Öland, Kastlösa, Kastlösa alvar	16.4507	56.4536	1927	S. Medelius & C. Jensen	B12492	0	0	1	0
S	Öland, Kastlösa, Kastlösa alvar	16.4507	56.4536	1907	H. Möller	B12485	0	0	1	0
S	Öland, Kastlösa, Kastlösa kyrka. Muren, RN: 1538596 / 6259293	16.4316	56.4597	1973	Tomas Hallingbäck 46095	B201847	0	0	1	0
S	Öland, Kastlösa, Penåsa alvar	16.5313	56.439	1917	R. Sterner	B12469	0	0	1	0
S	Öland, Kastlösa, Stora Dalby	16.4436	56.4802	1910	S. Medelius	B12480	0	0	1	0
S	Öland, Köping, Köpings branter	16.7092	56.8775	1932	H. Witte	B12489	0	0	1	0
S	Öland, Köping, Köpings branter	16.7092	56.8775	1917	S. Medelius	B12491	0	0	1	0
S	Öland, Köping, Köpings branter	16.7092	56.8775	1908	H. Möller	B12671	0	1	1	0
S	Öland, Köping, Köpings branter	16.7092	56.8775	1895	A. Tullgren	B12677	0	0	1	0
S	Öland, Köping, Köpings branter	16.7092	56.8775	1892	Erik Nyman	B12479	0	0	1	0
S	Öland, Långlöt, Ismantorps borg	16.6433	56.7453	1917	H. Möller	B12483	0	0	1	0
S	Öland, Mörbylånga, vid vägen mell. Bårby och Alby, 2 km V om Bårby	16.4665	56.5018	1949	G. Wistrand	B12487	1	0	0	0
S	Öland, N om Borgholm	16.6884	56.879	1980	L. Hedenäs	B13985	1	0	0	0
S	Öland, O om Kalkstad	16.5307	56.6092	1980	L. Hedenäs	B12481	1	0	0	0
S	Öland, Persnäs	16.8674	57.0853	1967	Gunnar Holmbring	B280099	1	0	0	0
S	Öland, Persnäs alvar	16.9349	57.0591	1932	H. Witte	B12488	1	0	0	0
S	Öland, Persnäs, Sandvik, W of Bäckekärret	16.8627	57.0817	2016	Lars Hedenäs	B236505	0	0	1	0
S	Öland, Resmo, alvar NE of Resmo	16.4534	56.5464	2010	Lars Hedenäs	B174642	0	0	1	0
S	Öland, Resmo, c. 2 km NE of Resmo	16.4727	56.5515	2015	Lars Hedenäs, Irene Bisang	B222109	0	0	1	0
S	Öland, Resmo, karstspringor på alvaret	16.4582	56.5439	1917	R. Sterner	B12476	1	0	0	0
S	Öland, Resmo, Mysinge, alvaret	16.4492	56.5227	1925	H. Ekman	B12474	0	0	1	0
S	Öland, Resmo, Resmo alvar	16.4582	56.5439	1916	H. Möller	B12679	0	0	1	0
S	Öland, Resmo, Resmo alvar	16.4582	56.5439	1904	H. Möller	B12674	0	0	1	0
S	Öland, Räpplinge, Alvaret E of Strandtorp	16.6249	56.83	2011	Lars Hedenäs, Irene Bisang	B183214	1	0	0	0
S	Öland, Stora Alvaret.	16.4	56.5	1951	Judith Christoffersson	B86703	0	0	1	0
S	Öland, Torslunda	16.5149	56.633	1906	H. Möller	B12482	0	0	1	0
S	Öland, Torslunda, Eriksöre alvar	16.4809	56.6057	1911	S. Medelius	B12490	1	0	0	0
S	Öland, Torslunda, Tveta	16.5522	56.6531	1917	H. Möller	B12484	1	0	0	0
S	Öland, Ventlinge, ESE of Kristinelund	16.4246	56.2954	2016	Lars Hedenäs	B236498	0	0	1	0
S	Öland, Ventlinge, N of Lunda	16.425	56.2768	2016	Lars Hedenäs	B236485	0	0	1	0
S	Öland, Ventlinge, S of quarry E of Grönhögen	16.4107	56.2692	2016	Lars Hedenäs	B236481	0	0	1	0
S	Öland, Vickleby alvar	16.4687	56.5759	1980	L. Hedenäs	B13988	1	0	0	0
S	Öland, Vickleby, Vickleby kyrka	16.46	56.5768	1965	S. O. Lindberg	B12471	1	0	0	0
S	Öland, vid Möckelmossen	16.5245	56.5314	1980	L. Hedenäs	B13977	0	0	1	0
S	Östergötland, Skeda, Åkerstads allé	15.5617	58.3447	1925	Alfred Arvén	B13383	0	1	0	0
S	Östergötland, V. Tollstad, Omberg, vid turisthotellet	14.635	58.3099	1917	S. Birger	B13403	0	0	1	0
